# Supplementary material for: Evolutionary History of LTR Retrotransposon Chromodomains in Plants
Source: PubMed Central journal article supplement (PMC3350952; doi:10.1155/2012/874743), 2012-04-29
Supplement: 874743.f1.pdf [file 874743.f1.pdf]

**Supplementary material Table S1.** List of Plant species used in this study, their taxonomy (according to NCBI Taxonomy:

<http://www.ncbi.nlm.nih.gov/taxonomy>) and results of *in silico* mining of chromodomains by LTR retrotransposons clades.

| Class            | Order             | Family             | Tribe                           | Species                                     | EST       |       |                        | GSS/WGS   |        |           |
|------------------|-------------------|--------------------|---------------------------------|---------------------------------------------|-----------|-------|------------------------|-----------|--------|-----------|
|                  |                   |                    |                                 |                                             | Chlamyvir | other |                        | Chlamyvir | other  |           |
| Bangiophyceae    | Bangiales         | Bangiaceae         |                                 | <i>Porphyra yezoensis</i>                   | --        | --    |                        | ND        | ND     |           |
|                  | Cyanidiales       | Cyanidiaceae       |                                 | <i>Galdieria sulphuraria</i>                | --        | --    |                        | ND        | ND     |           |
|                  |                   |                    |                                 | <i>Cyanidioschyzon merolae</i>              | ND        | ND    |                        | --        | --     |           |
| Trebouxiophyceae | Chlorellales      | Chlorellaceae      |                                 | <i>Chlorella vulgaris</i>                   | --        | --    |                        | 7         | --     |           |
| Chlorophyceae    | Chlamydomonadales | Chlamydomonadaceae |                                 | <i>Chlamydomonas reinhardtii</i>            | --        | --    |                        | 13        | 3      |           |
|                  |                   |                    |                                 | <i>Volvox carteri f. nagariensis</i>        | 3         | --    |                        | 241       | 20     |           |
| Prasinophyceae   |                   | Mamiellaceae       |                                 | <i>Micromonas pusilla</i>                   | ND        | ND    |                        | --        | --     |           |
|                  |                   |                    | <i>Ostreococcus lucimarinus</i> | ND                                          | ND        |       | --                     | --        |        |           |
|                  |                   |                    | <i>Ostreococcus tauri</i>       | ND                                          | ND        |       | --                     | --        |        |           |
|                  |                   |                    |                                 |                                             | Reina     | Tekay | Galadriel              | Reina     | Tekay  | Galadriel |
| Lycopodiopsida   | Lycopodiales      | Lycopodiaceae      |                                 | <i>Huperzia serrata</i>                     | --        | --    | --                     | ND        | ND     | ND        |
| Polypodiopsida   | Polypodiales      | Pteridaceae        |                                 | <i>Adiantum capillus-veneris</i>            | --        | 1     | --                     | ND        | ND     | ND        |
| Coniferopsida    | Coniferales       | Pinaceae           |                                 | <i>Picea glauca</i>                         | 6         | 2     | --                     | --        | --     | --        |
|                  |                   |                    |                                 | <i>Picea sitchensis</i>                     | 5         | 5     | --                     | ND        | ND     | ND        |
|                  |                   |                    |                                 | <i>Pinus taeda</i>                          | 4         | 5     | --                     | 18        | 2      | --        |
|                  |                   |                    |                                 | <i>Pinus banksiana</i>                      | 9         | 3     | --                     | --        | --     | --        |
|                  |                   |                    |                                 | <i>Pinus contorta</i>                       | 2         | 3     | --                     | ND        | ND     | ND        |
|                  |                   |                    |                                 | <i>Pseudotsuga menziesii var. menziesii</i> | 2         | 1     | --                     | ND        | ND     | ND        |
|                  |                   |                    |                                 | <i>Pseudotsuga menziesii</i>                | 1         | --    | --                     | ND        | ND     | ND        |
|                  |                   |                    |                                 | <i>Cryptomeria japonica</i>                 | 2         | --    | --                     | ND        | ND     | ND        |
|                  |                   |                    |                                 | <i>Wolffia arrhiza</i>                      | --        | --    | --                     | ND        | ND     | ND        |
|                  |                   |                    | Monocotyledons                  | Alismatales                                 | Araceae   |       | <i>Wolffia arrhiza</i> | --        | --     | --        |
|                  | Poales            | Poaceae            | Poeae                           | <i>Agrostis stolonifera</i>                 | 1         | 6     | --                     | ND        | ND     | ND        |
|                  |                   |                    |                                 | <i>Festuca arundinacea</i>                  | 19        | 4     | --                     | 1         | 10     | --        |
|                  |                   |                    |                                 | <i>Festuca pratensis</i>                    | 20        | 7     | --                     | ND        | ND     | ND        |
|                  |                   |                    |                                 | <i>Puccinellia tenuiflora</i>               | --        | --    | --                     | ND        | ND     | ND        |
|                  |                   |                    | Triticeae                       | <i>Hordeum vulgare</i>                      | --        | 2     | --                     | --        | 3      | --        |
|                  |                   |                    |                                 | <i>Hordeum vulgare subsp. vulgare</i>       | 5         | 5     | --                     | --        | --     | --        |
|                  |                   |                    |                                 | <i>Leymus cinereus x Leymus triticoides</i> | 1         | --    | --                     | ND        | ND     | ND        |
|                  |                   |                    |                                 | <i>Triticum aestivum</i>                    | 37        | 5     | --                     | 10        | 91     | --        |
|                  |                   |                    |                                 | <i>Triticum monococcum</i>                  | --        | --    | --                     | --        | --     | --        |
|                  |                   |                    |                                 | <i>Triticum turgidum subsp. durum</i>       | 2         | 2     | --                     | --        | --     | --        |
|                  |                   |                    |                                 | <i>Pseudoroegneria spicata</i>              | --        | --    | --                     | ND        | ND     | ND        |
|                  |                   |                    | Brachypodieae                   | <i>Brachypodium distachyon</i>              | 11        | --    | --                     | 46        | 371    | --        |
|                  |                   |                    | Oryzeae                         | <i>Oryza sativa</i>                         | 2         | 1     | --                     | --        | 8      | --        |
|                  |                   |                    |                                 | <i>Oryza sativa Indica Group</i>            | 5         | 1     | --                     | 64        | 239    | --        |
|                  |                   |                    |                                 | <i>Oryza sativa Japonica Group</i>          | 55        | 6     | --                     | 23        | 78     | --        |
|                  |                   |                    | Paniceae                        | <i>Panicum virgatum</i>                     | 11        | 1     | --                     | ND        | ND     | ND        |
|                  |                   |                    |                                 | <i>Pennisetum glaucum</i>                   | --        | 1     | --                     | --        | --     | --        |
|                  |                   |                    | Andropogoneae                   | <i>Saccharum hybrid cultivar CP72 2086</i>  | 1         | --    | --                     | ND        | ND     | ND        |
|                  |                   |                    |                                 | <i>Saccharum officinarum</i>                | 12        | 6     | --                     | ND        | ND     | ND        |
|                  |                   |                    |                                 | <i>Sorghum bicolor</i>                      | 14        | --    | --                     | 18        | >1000  | --        |
|                  |                   |                    |                                 | <i>Zea mays</i>                             | 53        | 105   | --                     | 600       | >10000 | --        |
|                  |                   |                    | Cynodonteae                     | <i>Cynodon dactylon</i>                     | --        | --    | --                     | --        | --     | --        |

**Supplementary material Table S1 (continued).** List of Plant species used in this study, their taxonomy (according to NCBI Taxonomy:

<http://www.ncbi.nlm.nih.gov/taxonomy>) and results of *in silico* mining of chromodomains by LTR retrotransposons clades.

|                | Order          | Family        | Tribe         | Species                                          | EST   |       |           | GSS/WGS |       |           |
|----------------|----------------|---------------|---------------|--------------------------------------------------|-------|-------|-----------|---------|-------|-----------|
|                |                |               |               |                                                  | Reina | Tekay | Galadriel | Reina   | Tekay | Galadriel |
| Monocotyledons | Poales         | Poaceae       | Eragrostideae | <i>Eragrostis curvula</i>                        | --    | --    | --        | ND      | ND    | ND        |
|                | Zingiberales   | Zingiberaceae |               | <i>Zingiber officinale</i>                       | --    | --    | --        | ND      | ND    | ND        |
| Eudicotyledons | Caryophyllales | Amaranthaceae |               | <i>Beta vulgaris</i>                             | --    | --    | 1         | 7       | 39    | --        |
|                |                | Aizoaceae     |               | <i>Mesembryanthemum crystallinum</i>             | --    | --    | --        | ND      | ND    | ND        |
|                |                | Tamaricaceae  |               | <i>Tamarix hispida</i>                           | --    | --    | --        | ND      | ND    | ND        |
|                | Ericales       | Actinidaceae  |               | <i>Actinidia chinensis</i>                       | --    | 1     | --        | ND      | ND    | ND        |
|                |                |               |               | <i>Actinidia deliciosa</i>                       | 2     | 9     | --        | --      | --    | --        |
|                |                | Theaceae      |               | <i>Camellia sinensis</i>                         | --    | --    | --        | --      | --    | --        |
|                | Asterales      | Asteraceae    | Anthemideae   | <i>Artemisia annua</i>                           | --    | 14    | --        | --      | --    | --        |
|                |                |               | Heliantheae   | <i>Helianthus annuus</i>                         | 5     | 2     | 3         | 1       | 4     | --        |
|                |                |               |               | <i>Zinnia violacea</i>                           | --    | 3     | --        | ND      | ND    | ND        |
|                |                |               | Mutisieae     | <i>Gerbera hybrid cultivar</i>                   | --    | --    | 1         | ND      | ND    | ND        |
|                |                |               | Cichorieae    | <i>Lactuca sativa</i>                            | --    | 1     | --        | --      | --    | --        |
|                |                |               |               | <i>Lactuca serriola</i>                          | --    | --    | 1         | ND      | ND    | ND        |
|                | Solanales      | Solanaceae    | Capsiceae     | <i>Capsicum annuum</i>                           | 11    | 4     | --        | --      | --    | --        |
|                |                |               | Solaneae      | <i>Solanum habrochaites</i>                      | --    | 2     | --        | ND      | ND    | ND        |
|                |                |               |               | <i>Solanum lycopersicum</i>                      | --    | 11    | --        | 17      | >1000 | 80        |
|                |                |               |               | <i>Solanum melongena</i>                         | --    | 4     | --        | --      | 1     | --        |
|                |                |               |               | <i>Solanum torvum</i>                            | --    | 3     | 3         | ND      | ND    | ND        |
|                |                |               |               | <i>Solanum tuberosum</i>                         | 2     | 8     | 1         | 11      | >1000 | 12        |
|                |                |               | Nicotianeae   | <i>Nicotiana benthamiana</i>                     | 14    | --    | --        | 18      | >1000 | --        |
|                |                |               |               | <i>Nicotiana tabacum</i>                         | 23    | 39    | 2         | 185     | 2973  | 297       |
|                | Lamiales       | Phrymaceae    |               | <i>Mimulus guttatus</i>                          | 2     | --    | 1         | 16      | 370   | 13        |
|                |                |               |               | <i>Mimulus lewisii</i>                           | --    | --    | --        | 4       | --    | --        |
|                |                | Orobanchaceae | Buchnereae    | <i>Striga hermonthica</i>                        | --    | 2     | --        | 10      | 34    | 1         |
|                |                |               | Rhinantheae   | <i>Triphysaria versicolor</i>                    | --    | --    | --        | ND      | ND    | ND        |
|                | Gentianales    | Apocynaceae   | Vinaceae      | <i>Catharanthus roseus</i>                       | --    | --    | --        | 1       | --    | --        |
|                |                | Rubiaceae     | Coffeaeae     | <i>Coffea arabica</i>                            | --    | --    | --        | 1       | 6     | --        |
|                | Apiales        | Araliaceae    |               | <i>Eleutherococcus sessiliflorus</i>             | --    | --    | --        | ND      | ND    | ND        |
|                |                |               |               | <i>Panax ginseng</i>                             | --    | --    | --        | --      | 5     | --        |
|                | Brassicales    | Brassicaceae  |               | <i>Arabidopsis thaliana</i>                      | 2     | 6     | --        | 14      | 23    | --        |
|                |                |               |               | <i>Brassica napus</i>                            | 2     | 3     | --        | 5       | 99    | 2         |
|                |                |               |               | <i>Brassica oleracea</i>                         | --    | --    | --        | 53      | 101   | 90        |
|                |                |               |               | <i>Brassica rapa</i>                             | --    | --    | 2         | 2       | 7     | 2         |
|                |                |               |               | <i>Raphanus sativus</i>                          | --    | 1     | --        | --      | --    | --        |
|                |                |               |               | <i>Raphanus raphanistrum subsp. raphanistrum</i> | --    | --    | --        | ND      | ND    | ND        |
|                |                |               |               | <i>Tropaeolum majus</i>                          | --    | --    | --        | ND      | ND    | ND        |
|                | Sapindales     | Rutaceae      |               | <i>Citrus clementina</i>                         | --    | --    | 1         | 11      | 8     | 35        |
|                |                |               |               | <i>Citrus sinensis</i>                           | 2     | 5     | 3         | ND      | ND    | ND        |
|                |                |               |               | <i>Citrus trifoliata</i>                         | --    | 1     | --        | ND      | ND    | ND        |
|                |                |               |               | <i>Citrus unshiu</i>                             | --    | --    | 1         | ND      | ND    | ND        |

**Supplementary material Table S1 (continued).** List of Plant species used in this study, their taxonomy (according to NCBI Taxonomy:

<http://www.ncbi.nlm.nih.gov/taxonomy>) and results of *in silico* mining of chromodomains by LTR retrotransposons clades.

|                | Order        | Family        | Tribe        | Species                                        | EST   |       |           | GSS/WGS |       |           |
|----------------|--------------|---------------|--------------|------------------------------------------------|-------|-------|-----------|---------|-------|-----------|
|                |              |               |              |                                                | Reina | Tekay | Galadriel | Reina   | Tekay | Galadriel |
| Eudicotyledons | Malvales     | Malvaceae     |              | <i>Gossypium arboreum</i>                      | --    | 6     | --        | --      | --    | --        |
|                |              |               |              | <i>Gossypium hirsutum</i>                      | 3     | 17    | 3         | 3       | 406   | 17        |
|                |              |               |              | <i>Gossypium raimondii</i>                     | 1     | 2     | --        | 1       | 91    | 4         |
|                |              |               |              | <i>Theobroma cacao</i>                         | --    | 3     | --        | --      | --    | --        |
|                | Myrtales     | Myrtaceae     |              | <i>Eucalyptus gunnii</i>                       | --    | --    | --        | ND      | ND    | ND        |
|                | Fabales      | Fabaceae      | Dalbergieae  | <i>Arachis hypogaea</i>                        | 3     | 3     | 1         | --      | 9     | --        |
|                |              |               | Phaseoleae   | <i>Glycine max</i>                             | 1     | 2     | --        | 22      | 252   | --        |
|                |              |               |              | <i>Glycine soja</i>                            | --    | --    | --        | 17      | 306   | --        |
|                |              |               |              | <i>Vigna unguiculata</i>                       | 3     | --    | --        | 7       | 99    | --        |
|                |              |               |              | <i>Cajanus cajan</i>                           | --    | --    | --        | 11      | 113   | --        |
|                |              |               | Loteae       | <i>Lotus japonicus</i>                         | 2     | 3     | --        | 8       | 62    | --        |
|                |              |               | Trifolieae   | <i>Medicago sativa</i>                         | 1     | 1     | --        | --      | --    | --        |
|                |              |               |              | <i>Medicago truncatula</i>                     | --    | 2     | --        | 3       | 322   | --        |
|                |              |               |              | <i>Trifolium pratense</i>                      | --    | --    | --        | 1       | 8     | --        |
|                |              |               | Phaseoleae   | <i>Phaseolus vulgaris</i>                      | --    | 2     | --        | --      | --    | --        |
|                |              |               |              | <i>Phaseolus angustissimus</i>                 | --    | --    | --        | ND      | ND    | ND        |
|                |              |               | Fabeae       | <i>Pisum sativum</i>                           | 1     | --    | --        | --      | --    | --        |
|                |              |               | Cicereae     | <i>Cicer arietinum</i>                         | --    | --    | --        | 12      | 309   | --        |
|                |              |               | Galegeae     | <i>Glycyrrhiza uralensis</i>                   | --    | --    | --        | ND      | ND    | ND        |
|                | Cucurbitales | Cucurbitaceae |              | <i>Cucumis sativus</i>                         | --    | --    | 1         | 1       | 2     | --        |
|                | Rosales      | Rosaceae      | Potentilleae | <i>Fragaria vesca</i>                          | --    | --    | 4         | ND      | ND    | ND        |
|                |              |               | Pyreae       | <i>Malus x domestica</i>                       | 3     | 1     | --        | --      | --    | --        |
|                |              |               | Amygdaleae   | <i>Prunus persica</i>                          | --    | 1     | --        | 1       | 18    | 4         |
|                |              | Cannabaceae   |              | <i>Humulus lupulus</i>                         | 1     | --    | --        | ND      | ND    | ND        |
|                |              |               |              | <i>Cannabis sativa</i>                         | --    | --    | --        | ND      | ND    | ND        |
|                | Fagales      | Juglandaceae  |              | <i>Juglans hindsii x Juglans regia</i>         | 1     | --    | --        | ND      | ND    | ND        |
|                |              | Fagaceae      |              | <i>Quercus robur</i>                           | 1     | --    | --        | ND      | ND    | ND        |
|                |              | Betulaceae    |              | <i>Betula platyphylla</i>                      | --    | --    | --        | ND      | ND    | ND        |
|                | Malpighiales | Euphorbiaceae | Manihoteae   | <i>Manihot esculenta</i>                       | --    | 2     | --        | 1       | 31    | --        |
|                |              | Salicaceae    | Saliceae     | <i>Populus tremula x Populus tremuloides</i>   | --    | 1     | --        | ND      | ND    | ND        |
|                |              |               |              | <i>Populus trichocarpa x Populus deltoides</i> | 3     | 1     | --        | ND      | ND    | ND        |
|                | Vitales      | Vitaceae      |              | <i>Vitis vinifera</i>                          | --    | 4     | 4         | 18      | 59    | 327       |
|                | Ranunculales | Ranunculaceae |              | <i>Aquilegia formosa x Aquilegia pubescens</i> | 5     | --    | --        | ND      | ND    | ND        |
|                |              | Papaveraceae  |              | <i>Papaver somniferum</i>                      | 7     | 3     | 2         | ND      | ND    | ND        |
|                | Malvales     | Malvaceae     |              | <i>Gossypium arboreum</i>                      | --    | 6     | --        | --      | --    | --        |
|                |              |               |              | <i>Gossypium hirsutum</i>                      | 3     | 17    | 3         | 3       | 406   | 17        |
|                |              |               |              | <i>Gossypium raimondii</i>                     | 1     | 2     | --        | 1       | 91    | 4         |

**Supplementary material Table S2.** List of species genomes of which were analyzed *in silico* in present study and the sources of the ESTs and/or genomic sequences.

| Class            | Order        | Family             | Species                                     | Organization: Web link                                                                                                                                                                                                                                                                                                |
|------------------|--------------|--------------------|---------------------------------------------|-----------------------------------------------------------------------------------------------------------------------------------------------------------------------------------------------------------------------------------------------------------------------------------------------------------------------|
| Bangiophyceae    |              | Bangiaceae         | <i>Porphyra yezoensis</i>                   | KDRI: <a href="http://est.kazusa.or.jp/en/plant/porphyra/EST/">http://est.kazusa.or.jp/en/plant/porphyra/EST/</a>                                                                                                                                                                                                     |
|                  |              | Cyanidiaceae       | <i>Galdieria sulphuraria</i>                | MSU: <a href="http://genomics.msu.edu/galdieria/">http://genomics.msu.edu/galdieria/</a>                                                                                                                                                                                                                              |
|                  |              |                    | <i>Cyanidioschyzon merolae</i>              | <a href="http://merolae.biol.s.u-tokyo.ac.jp/">http://merolae.biol.s.u-tokyo.ac.jp/</a>                                                                                                                                                                                                                               |
| Trebouxiophyceae | Chlorellales | Chlorellaceae      | <i>Chlorella vulgaris</i>                   | JGI: <a href="http://genome.jgi-psf.org/Chlvu1/Chlvu1.home.html">http://genome.jgi-psf.org/Chlvu1/Chlvu1.home.html</a>                                                                                                                                                                                                |
| Chlorophyceae    |              | Chlamydomonadaceae | <i>Chlamydomonas reinhardtii</i>            | KDRI: <a href="http://est.kazusa.or.jp/en/plant/chlamy/EST/">http://est.kazusa.or.jp/en/plant/chlamy/EST/</a><br>PlantGDB: <a href="http://www.plantgdb.org/prj/ESTcluster/">http://www.plantgdb.org/prj/ESTcluster/</a><br>JGI Phytozome: <a href="http://www.phytozome.net/">http://www.phytozome.net/</a>          |
| Prasinophyceae   |              | Mamiellaceae       | <i>Micromonas pusilla</i>                   | JGI: <a href="http://genome.jgi-psf.org/MicpuC1/MicpuC1.home.html">http://genome.jgi-psf.org/MicpuC1/MicpuC1.home.html</a>                                                                                                                                                                                            |
|                  |              |                    | <i>Ostreococcus lucimarinus</i>             | PlantGDB: <a href="http://www.plantgdb.org/prj/ESTcluster/">http://www.plantgdb.org/prj/ESTcluster/</a>                                                                                                                                                                                                               |
|                  |              |                    | <i>Ostreococcus tauri</i>                   | JGI: <a href="http://genome.jgi-psf.org/Ostva4/Ostva4.home.html">http://genome.jgi-psf.org/Ostva4/Ostva4.home.html</a>                                                                                                                                                                                                |
|                  |              |                    | <i>Volvox carterif nagariensis</i>          | JGI Phytozome: <a href="http://www.phytozome.net/">http://www.phytozome.net/</a><br>JGI: <a href="http://genome.jgi-psf.org/Volca1/Volca1.home.html">http://genome.jgi-psf.org/Volca1/Volca1.home.html</a><br>PlantGDB: <a href="http://www.plantgdb.org/prj/ESTcluster/">http://www.plantgdb.org/prj/ESTcluster/</a> |
| Lycopodiopsida   | Lycopodiales | Lycopodiaceae      | <i>Huperzia serrata</i>                     | NCBI SRA: <a href="http://www.ncbi.nlm.nih.gov/sra/SRX010999">http://www.ncbi.nlm.nih.gov/sra/SRX010999</a>                                                                                                                                                                                                           |
| Polypodiopsida   | Polypodiales | Pteridaceae        | <i>Adiantum capillus-veneris</i>            | PlantGDB: <a href="http://www.plantgdb.org/prj/ESTcluster/">http://www.plantgdb.org/prj/ESTcluster/</a>                                                                                                                                                                                                               |
| Coniferopsida    | Coniferales  | Pinaceae           | <i>Picea glauca</i>                         | PlantGDB: <a href="http://www.plantgdb.org/prj/ESTcluster/">http://www.plantgdb.org/prj/ESTcluster/</a>                                                                                                                                                                                                               |
|                  |              |                    | <i>Picea sitchensis</i>                     | PlantGDB: <a href="http://www.plantgdb.org/prj/ESTcluster/">http://www.plantgdb.org/prj/ESTcluster/</a>                                                                                                                                                                                                               |
|                  |              |                    | <i>Pinus taeda</i>                          | MGEL: <a href="http://www.pine.msstate.edu/seq.htm">http://www.pine.msstate.edu/seq.htm</a><br>PlantGDB: <a href="http://www.plantgdb.org/prj/ESTcluster/">http://www.plantgdb.org/prj/ESTcluster/</a>                                                                                                                |
|                  |              |                    | <i>Pinus banksiana</i>                      | PlantGDB: <a href="http://www.plantgdb.org/prj/ESTcluster/">http://www.plantgdb.org/prj/ESTcluster/</a>                                                                                                                                                                                                               |
|                  |              |                    | <i>Pinus contorta</i>                       | PlantGDB: <a href="http://www.plantgdb.org/prj/ESTcluster/">http://www.plantgdb.org/prj/ESTcluster/</a>                                                                                                                                                                                                               |
|                  |              |                    | <i>Pseudotsuga menziesii var. menziesii</i> | PlantGDB: <a href="http://www.plantgdb.org/prj/ESTcluster/">http://www.plantgdb.org/prj/ESTcluster/</a>                                                                                                                                                                                                               |
|                  |              |                    | <i>Pseudotsuga menziesii</i>                | PlantGDB: <a href="http://www.plantgdb.org/prj/ESTcluster/">http://www.plantgdb.org/prj/ESTcluster/</a>                                                                                                                                                                                                               |
|                  |              |                    | <i>Cryptomeria japonica</i>                 | PlantGDB: <a href="http://www.plantgdb.org/prj/ESTcluster/">http://www.plantgdb.org/prj/ESTcluster/</a>                                                                                                                                                                                                               |
| Monocotyledons   | Alismatales  | Araceae            | <i>Wolffia arrhiza</i>                      | PlantGDB: <a href="http://www.plantgdb.org/prj/ESTcluster/">http://www.plantgdb.org/prj/ESTcluster/</a>                                                                                                                                                                                                               |
|                  | Poales       | Poaceae            | <i>Agrostis stolonifera</i>                 | PlantGDB: <a href="http://www.plantgdb.org/prj/ESTcluster/">http://www.plantgdb.org/prj/ESTcluster/</a>                                                                                                                                                                                                               |
|                  |              |                    | <i>Festuca arundinacea</i>                  | PlantGDB: <a href="http://www.plantgdb.org/prj/ESTcluster/">http://www.plantgdb.org/prj/ESTcluster/</a>                                                                                                                                                                                                               |
|                  |              |                    | <i>Festuca pratensis</i>                    | PlantGDB: <a href="http://www.plantgdb.org/prj/ESTcluster/">http://www.plantgdb.org/prj/ESTcluster/</a>                                                                                                                                                                                                               |
|                  |              |                    | <i>Hordeum vulgare</i>                      | PlantGDB: <a href="http://www.plantgdb.org/HvGDB/">http://www.plantgdb.org/HvGDB/</a>                                                                                                                                                                                                                                 |
|                  |              |                    | <i>Hordeum vulgare subsp. vulgare</i>       | PlantGDB: <a href="http://www.plantgdb.org/prj/ESTcluster/">http://www.plantgdb.org/prj/ESTcluster/</a>                                                                                                                                                                                                               |
|                  |              |                    | <i>Leymus cinereus x Leymus triticoides</i> | PlantGDB: <a href="http://www.plantgdb.org/prj/ESTcluster/">http://www.plantgdb.org/prj/ESTcluster/</a>                                                                                                                                                                                                               |
|                  |              |                    | <i>Triticum aestivum</i>                    | PlantGDB: <a href="http://www.plantgdb.org/prj/ESTcluster/">http://www.plantgdb.org/prj/ESTcluster/</a>                                                                                                                                                                                                               |
|                  |              |                    | <i>Triticum monococcum</i>                  | PlantGDB: <a href="http://www.plantgdb.org/prj/ESTcluster/">http://www.plantgdb.org/prj/ESTcluster/</a>                                                                                                                                                                                                               |
|                  |              |                    | <i>Triticum turgidum subsp durum</i>        | PlantGDB: <a href="http://www.plantgdb.org/prj/ESTcluster/">http://www.plantgdb.org/prj/ESTcluster/</a>                                                                                                                                                                                                               |
|                  |              |                    | <i>Pseudoroegneria spicata</i>              | PlantGDB: <a href="http://www.plantgdb.org/prj/ESTcluster/">http://www.plantgdb.org/prj/ESTcluster/</a>                                                                                                                                                                                                               |
|                  |              |                    | <i>Brachypodium distachyon</i>              | JGI Phytozome: <a href="http://www.phytozome.net/">http://www.phytozome.net/</a><br>PlantGDB: <a href="http://www.plantgdb.org/BdGDB/">http://www.plantgdb.org/BdGDB/</a><br>PlantGDB: <a href="http://www.plantgdb.org/prj/ESTcluster/">http://www.plantgdb.org/prj/ESTcluster/</a>                                  |
|                  |              |                    | <i>Oryza sativa</i>                         | JGI Phytozome: <a href="http://www.phytozome.net/">http://www.phytozome.net/</a><br>PlantGDB: <a href="http://www.plantgdb.org/prj/ESTcluster/">http://www.plantgdb.org/prj/ESTcluster/</a>                                                                                                                           |
|                  |              |                    | <i>Oryza sativa Indica Group</i>            | PlantGDB: <a href="http://www.plantgdb.org/prj/ESTcluster/">http://www.plantgdb.org/prj/ESTcluster/</a>                                                                                                                                                                                                               |
|                  |              |                    | <i>Oryza sativa Japonica Group</i>          | PlantGDB: <a href="http://www.plantgdb.org/prj/ESTcluster/">http://www.plantgdb.org/prj/ESTcluster/</a>                                                                                                                                                                                                               |
|                  |              |                    | <i>Panicum virgatum</i>                     | PlantGDB: <a href="http://www.plantgdb.org/prj/ESTcluster/">http://www.plantgdb.org/prj/ESTcluster/</a>                                                                                                                                                                                                               |

**Supplementary material Table S2 (continued).** List of species genomes of which were analyzed *in silico* in present study and the sources of the ESTs and/or genomic sequences.

| Class          | Order          | Family        | Species                                    | Organization: Web link                                                                                                                                                                      |
|----------------|----------------|---------------|--------------------------------------------|---------------------------------------------------------------------------------------------------------------------------------------------------------------------------------------------|
|                |                |               | <i>Saccharum hybrid cultivar CP72 2086</i> | PlantGDB: <a href="http://www.plantgdb.org/prj/ESTCluster/">http://www.plantgdb.org/prj/ESTCluster/</a>                                                                                     |
|                |                |               | <i>Saccharum officinarum</i>               | PlantGDB: <a href="http://www.plantgdb.org/prj/ESTCluster/">http://www.plantgdb.org/prj/ESTCluster/</a>                                                                                     |
|                |                |               | <i>Sorghum bicolor</i>                     | JGI Phytozome: <a href="http://www.phytozome.net/">http://www.phytozome.net/</a><br>PlantGDB: <a href="http://www.plantgdb.org/prj/ESTCluster/">http://www.plantgdb.org/prj/ESTCluster/</a> |
|                |                |               | <i>Zea mays</i>                            | JGI Phytozome: <a href="http://www.phytozome.net/">http://www.phytozome.net/</a><br>PlantGDB: <a href="http://www.plantgdb.org/prj/ESTCluster/">http://www.plantgdb.org/prj/ESTCluster/</a> |
|                |                |               | <i>Cynodon dactylon</i>                    | PlantGDB: <a href="http://www.plantgdb.org/prj/ESTCluster/">http://www.plantgdb.org/prj/ESTCluster/</a>                                                                                     |
|                |                |               | <i>Eragrostis curvula</i>                  | PlantGDB: <a href="http://www.plantgdb.org/prj/ESTCluster/">http://www.plantgdb.org/prj/ESTCluster/</a>                                                                                     |
|                | Zingiberales   | Zingiberaceae | <i>Zingiber officinale</i>                 | PlantGDB: <a href="http://www.plantgdb.org/prj/ESTCluster/">http://www.plantgdb.org/prj/ESTCluster/</a>                                                                                     |
| Eudicotyledons | Caryophyllales | Amaranthaceae | <i>Beta vulgaris</i>                       | PlantGDB: <a href="http://www.plantgdb.org/prj/ESTCluster/">http://www.plantgdb.org/prj/ESTCluster/</a>                                                                                     |
|                |                | Aizoaceae     | <i>Mesembryanthemum crystallinum</i>       | PlantGDB: <a href="http://www.plantgdb.org/prj/ESTCluster/">http://www.plantgdb.org/prj/ESTCluster/</a>                                                                                     |
|                |                | Tamaricaceae  | <i>Tamarix hispida</i>                     | PlantGDB: <a href="http://www.plantgdb.org/prj/ESTCluster/">http://www.plantgdb.org/prj/ESTCluster/</a>                                                                                     |
|                | Ericales       | Actinidaceae  | <i>Actinidia chinensis</i>                 | PlantGDB: <a href="http://www.plantgdb.org/prj/ESTCluster/">http://www.plantgdb.org/prj/ESTCluster/</a>                                                                                     |
|                |                |               | <i>Actinidia deliciosa</i>                 | PlantGDB: <a href="http://www.plantgdb.org/prj/ESTCluster/">http://www.plantgdb.org/prj/ESTCluster/</a>                                                                                     |
|                |                | Theaceae      | <i>Camellia sinensis</i>                   | PlantGDB: <a href="http://www.plantgdb.org/prj/ESTCluster/">http://www.plantgdb.org/prj/ESTCluster/</a>                                                                                     |
|                | Asterales      | Asteraceae    | <i>Artemisia annua</i>                     | PlantGDB: <a href="http://www.plantgdb.org/prj/ESTCluster/">http://www.plantgdb.org/prj/ESTCluster/</a>                                                                                     |
|                |                |               | <i>Helianthus annuus</i>                   | PlantGDB: <a href="http://www.plantgdb.org/prj/ESTCluster/">http://www.plantgdb.org/prj/ESTCluster/</a>                                                                                     |
|                |                |               | <i>Zinnia violacea</i>                     | PlantGDB: <a href="http://www.plantgdb.org/prj/ESTCluster/">http://www.plantgdb.org/prj/ESTCluster/</a>                                                                                     |
|                |                |               | <i>Gerbera hybrid cultivar</i>             | PlantGDB: <a href="http://www.plantgdb.org/prj/ESTCluster/">http://www.plantgdb.org/prj/ESTCluster/</a>                                                                                     |
|                |                |               | <i>Lactuca sativa</i>                      | PlantGDB: <a href="http://www.plantgdb.org/prj/ESTCluster/">http://www.plantgdb.org/prj/ESTCluster/</a>                                                                                     |
|                |                |               | <i>Lactuca serriola</i>                    | PlantGDB: <a href="http://www.plantgdb.org/prj/ESTCluster/">http://www.plantgdb.org/prj/ESTCluster/</a>                                                                                     |
|                | Solanales      | Solanaceae    | <i>Capsicum annuum</i>                     | PlantGDB: <a href="http://www.plantgdb.org/prj/ESTCluster/">http://www.plantgdb.org/prj/ESTCluster/</a>                                                                                     |
|                |                |               | <i>Solanum habrochaites</i>                | PlantGDB: <a href="http://www.plantgdb.org/prj/ESTCluster/">http://www.plantgdb.org/prj/ESTCluster/</a>                                                                                     |
|                |                |               | <i>Solanum lycopersicum</i>                | PlantGDB: <a href="http://www.plantgdb.org/prj/ESTCluster/">http://www.plantgdb.org/prj/ESTCluster/</a>                                                                                     |
|                |                |               | <i>Solanum melongena</i>                   | PlantGDB: <a href="http://www.plantgdb.org/prj/ESTCluster/">http://www.plantgdb.org/prj/ESTCluster/</a>                                                                                     |
|                |                |               | <i>Solanum torvum</i>                      | PlantGDB: <a href="http://www.plantgdb.org/prj/ESTCluster/">http://www.plantgdb.org/prj/ESTCluster/</a>                                                                                     |
|                |                |               | <i>Solanum tuberosum</i>                   | PlantGDB: <a href="http://www.plantgdb.org/prj/ESTCluster/">http://www.plantgdb.org/prj/ESTCluster/</a>                                                                                     |
|                |                |               | <i>Nicotiana benthamiana</i>               | PlantGDB: <a href="http://www.plantgdb.org/prj/ESTCluster/">http://www.plantgdb.org/prj/ESTCluster/</a>                                                                                     |
|                |                |               | <i>Nicotiana tabacum</i>                   | PlantGDB: <a href="http://www.plantgdb.org/prj/ESTCluster/">http://www.plantgdb.org/prj/ESTCluster/</a>                                                                                     |
|                | Lamiales       | Phrymaceae    | <i>Mimulus guttatus</i>                    | JGI Phytozome: <a href="http://www.phytozome.net/">http://www.phytozome.net/</a><br>PlantGDB: <a href="http://www.plantgdb.org/prj/ESTCluster/">http://www.plantgdb.org/prj/ESTCluster/</a> |
|                |                |               | <i>Mimulus lewisii</i>                     | PlantGDB: <a href="http://www.plantgdb.org/prj/ESTCluster/">http://www.plantgdb.org/prj/ESTCluster/</a>                                                                                     |
|                |                | Orobanchaceae | <i>Striga hermonthica</i>                  | PlantGDB: <a href="http://www.plantgdb.org/prj/ESTCluster/">http://www.plantgdb.org/prj/ESTCluster/</a>                                                                                     |
|                |                |               | <i>Triphysaria versicolor</i>              | PlantGDB: <a href="http://www.plantgdb.org/prj/ESTCluster/">http://www.plantgdb.org/prj/ESTCluster/</a>                                                                                     |
|                | Gentianales    | Apocynaceae   | <i>Catharanthus roseus</i>                 | PlantGDB: <a href="http://www.plantgdb.org/prj/ESTCluster/">http://www.plantgdb.org/prj/ESTCluster/</a>                                                                                     |
|                |                | Rubiaceae     | <i>Coffea arabica</i>                      | PlantGDB: <a href="http://www.plantgdb.org/prj/ESTCluster/">http://www.plantgdb.org/prj/ESTCluster/</a>                                                                                     |
|                | Apiales        | Araliaceae    | <i>Eleutherococcus sessiliflorus</i>       | PlantGDB: <a href="http://www.plantgdb.org/prj/ESTCluster/">http://www.plantgdb.org/prj/ESTCluster/</a>                                                                                     |
|                |                |               | <i>Panax ginseng</i>                       | PlantGDB: <a href="http://www.plantgdb.org/prj/ESTCluster/">http://www.plantgdb.org/prj/ESTCluster/</a>                                                                                     |
|                | Brassicales    | Brassicaceae  | <i>Arabidopsis thaliana</i>                | PlantGDB: <a href="http://www.plantgdb.org/prj/ESTCluster/">http://www.plantgdb.org/prj/ESTCluster/</a>                                                                                     |
|                |                |               | <i>Brassica napus</i>                      | PlantGDB: <a href="http://www.plantgdb.org/prj/ESTCluster/">http://www.plantgdb.org/prj/ESTCluster/</a>                                                                                     |
|                |                |               | <i>Brassica oleracea</i>                   | PlantGDB: <a href="http://www.plantgdb.org/prj/ESTCluster/">http://www.plantgdb.org/prj/ESTCluster/</a>                                                                                     |
|                |                |               | <i>Brassica rapa</i>                       | PlantGDB: <a href="http://www.plantgdb.org/prj/ESTCluster/">http://www.plantgdb.org/prj/ESTCluster/</a>                                                                                     |
|                |                |               | <i>Raphanus sativus</i>                    | PlantGDB: <a href="http://www.plantgdb.org/prj/ESTCluster/">http://www.plantgdb.org/prj/ESTCluster/</a>                                                                                     |

**Supplementary material Table S2 (continued).** List of species genomes of which were analyzed *in silico* in present study and the sources of the ESTs and/or genomic sequences.

| Class          | Order        | Family        | Species                                                 | Organization: Web link                                                                                                                                                                      |
|----------------|--------------|---------------|---------------------------------------------------------|---------------------------------------------------------------------------------------------------------------------------------------------------------------------------------------------|
| Eudicotyledons |              |               | <i>Raphanus raphanistrum</i> subsp. <i>raphanistrum</i> | PlantGDB: <a href="http://www.plantgdb.org/prj/ESTCluster/">http://www.plantgdb.org/prj/ESTCluster/</a>                                                                                     |
|                |              |               | <i>Tropaeolum majus</i>                                 | PlantGDB: <a href="http://www.plantgdb.org/prj/ESTCluster/">http://www.plantgdb.org/prj/ESTCluster/</a>                                                                                     |
|                | Sapindales   | Rutaceae      | <i>Citrus clementina</i>                                | JGI Phytozome: <a href="http://www.phytozome.net/">http://www.phytozome.net/</a><br>PlantGDB: <a href="http://www.plantgdb.org/prj/ESTCluster/">http://www.plantgdb.org/prj/ESTCluster/</a> |
|                |              |               | <i>Citrus sinensis</i>                                  | JGI Phytozome: <a href="http://www.phytozome.net/">http://www.phytozome.net/</a><br>PlantGDB: <a href="http://www.plantgdb.org/prj/ESTCluster/">http://www.plantgdb.org/prj/ESTCluster/</a> |
|                |              |               | <i>Citrus trifoliata</i>                                | PlantGDB: <a href="http://www.plantgdb.org/prj/ESTCluster/">http://www.plantgdb.org/prj/ESTCluster/</a>                                                                                     |
|                |              |               | <i>Citrus unshiu</i>                                    | PlantGDB: <a href="http://www.plantgdb.org/prj/ESTCluster/">http://www.plantgdb.org/prj/ESTCluster/</a>                                                                                     |
|                | Myrtales     | Myrtaceae     | <i>Eucalyptus gunnii</i>                                | PlantGDB: <a href="http://www.plantgdb.org/prj/ESTCluster/">http://www.plantgdb.org/prj/ESTCluster/</a>                                                                                     |
|                | Fabales      | Fabaceae      | <i>Arachis hypogaea</i>                                 | PlantGDB: <a href="http://www.plantgdb.org/prj/ESTCluster/">http://www.plantgdb.org/prj/ESTCluster/</a>                                                                                     |
|                |              |               | <i>Glycine max</i>                                      | JGI Phytozome: <a href="http://www.phytozome.net/">http://www.phytozome.net/</a><br>PlantGDB: <a href="http://www.plantgdb.org/prj/ESTCluster/">http://www.plantgdb.org/prj/ESTCluster/</a> |
|                |              |               | <i>Glycine soja</i>                                     | PlantGDB: <a href="http://www.plantgdb.org/prj/ESTCluster/">http://www.plantgdb.org/prj/ESTCluster/</a>                                                                                     |
|                |              |               | <i>Vigna unguiculata</i>                                | PlantGDB: <a href="http://www.plantgdb.org/prj/ESTCluster/">http://www.plantgdb.org/prj/ESTCluster/</a>                                                                                     |
|                |              |               | <i>Cajanus cajan</i>                                    | PlantGDB: <a href="http://www.plantgdb.org/prj/ESTCluster/">http://www.plantgdb.org/prj/ESTCluster/</a>                                                                                     |
|                |              |               | <i>Lotus japonicus</i>                                  | PlantGDB: <a href="http://www.plantgdb.org/prj/ESTCluster/">http://www.plantgdb.org/prj/ESTCluster/</a>                                                                                     |
|                |              |               | <i>Medicago sativa</i>                                  | PlantGDB: <a href="http://www.plantgdb.org/prj/ESTCluster/">http://www.plantgdb.org/prj/ESTCluster/</a>                                                                                     |
|                |              |               | <i>Medicago truncatula</i>                              | JGI Phytozome: <a href="http://www.phytozome.net/">http://www.phytozome.net/</a><br>PlantGDB: <a href="http://www.plantgdb.org/prj/ESTCluster/">http://www.plantgdb.org/prj/ESTCluster/</a> |
|                |              |               | <i>Trifolium pratense</i>                               | PlantGDB: <a href="http://www.plantgdb.org/prj/ESTCluster/">http://www.plantgdb.org/prj/ESTCluster/</a>                                                                                     |
|                |              |               | <i>Phaseolus vulgaris</i>                               | PlantGDB: <a href="http://www.plantgdb.org/prj/ESTCluster/">http://www.plantgdb.org/prj/ESTCluster/</a>                                                                                     |
|                |              |               | <i>Phaseolus angustissimus</i>                          | PlantGDB: <a href="http://www.plantgdb.org/prj/ESTCluster/">http://www.plantgdb.org/prj/ESTCluster/</a>                                                                                     |
|                |              |               | <i>Pisum sativum</i>                                    | PlantGDB: <a href="http://www.plantgdb.org/prj/ESTCluster/">http://www.plantgdb.org/prj/ESTCluster/</a>                                                                                     |
|                |              |               | <i>Cicer arietinum</i>                                  | PlantGDB: <a href="http://www.plantgdb.org/prj/ESTCluster/">http://www.plantgdb.org/prj/ESTCluster/</a>                                                                                     |
|                |              |               | <i>Glycyrrhiza uralensis</i>                            | PlantGDB: <a href="http://www.plantgdb.org/prj/ESTCluster/">http://www.plantgdb.org/prj/ESTCluster/</a>                                                                                     |
|                | Cucurbitales | Cucurbitaceae | <i>Cucumis sativus</i>                                  | JGI Phytozome: <a href="http://www.phytozome.net/">http://www.phytozome.net/</a><br>PlantGDB: <a href="http://www.plantgdb.org/prj/ESTCluster/">http://www.plantgdb.org/prj/ESTCluster/</a> |
|                | Rosales      | Rosaceae      | <i>Fragaria vesca</i>                                   | PlantGDB: <a href="http://www.plantgdb.org/prj/ESTCluster/">http://www.plantgdb.org/prj/ESTCluster/</a>                                                                                     |
|                |              |               | <i>Malus x domestica</i>                                | PlantGDB: <a href="http://www.plantgdb.org/prj/ESTCluster/">http://www.plantgdb.org/prj/ESTCluster/</a>                                                                                     |
|                |              |               | <i>Prunus persica</i>                                   | JGI Phytozome: <a href="http://www.phytozome.net/">http://www.phytozome.net/</a><br>PlantGDB: <a href="http://www.plantgdb.org/prj/ESTCluster/">http://www.plantgdb.org/prj/ESTCluster/</a> |
|                |              | Cannabaceae   | <i>Humulus lupulus</i>                                  | PlantGDB: <a href="http://www.plantgdb.org/prj/ESTCluster/">http://www.plantgdb.org/prj/ESTCluster/</a>                                                                                     |
|                |              |               | <i>Cannabis sativa</i>                                  | PlantGDB: <a href="http://www.plantgdb.org/prj/ESTCluster/">http://www.plantgdb.org/prj/ESTCluster/</a>                                                                                     |
|                | Fagales      | Juglandaceae  | <i>Juglans hindsii</i> x <i>Juglans regia</i>           | PlantGDB: <a href="http://www.plantgdb.org/prj/ESTCluster/">http://www.plantgdb.org/prj/ESTCluster/</a>                                                                                     |
|                |              | Fagaceae      | <i>Quercus robur</i>                                    | PlantGDB: <a href="http://www.plantgdb.org/prj/ESTCluster/">http://www.plantgdb.org/prj/ESTCluster/</a>                                                                                     |
|                |              | Betulaceae    | <i>Betula platyphylla</i>                               | PlantGDB: <a href="http://www.plantgdb.org/prj/ESTCluster/">http://www.plantgdb.org/prj/ESTCluster/</a>                                                                                     |
|                | Malpighiales | Euphorbiaceae | <i>Manihot esculenta</i>                                | PlantGDB: <a href="http://www.plantgdb.org/prj/ESTCluster/">http://www.plantgdb.org/prj/ESTCluster/</a>                                                                                     |
|                |              | Salicaceae    | <i>Populus tremula</i> x <i>Populus tremuloides</i>     | PlantGDB: <a href="http://www.plantgdb.org/prj/ESTCluster/">http://www.plantgdb.org/prj/ESTCluster/</a>                                                                                     |
|                |              |               | <i>Populus trichocarpa</i> x <i>Populus deltoides</i>   | PlantGDB: <a href="http://www.plantgdb.org/prj/ESTCluster/">http://www.plantgdb.org/prj/ESTCluster/</a>                                                                                     |
|                | Vitales      | Vitaceae      | <i>Vitis vinifera</i>                                   | JGI Phytozome: <a href="http://www.phytozome.net/">http://www.phytozome.net/</a><br>PlantGDB: <a href="http://www.plantgdb.org/prj/ESTCluster/">http://www.plantgdb.org/prj/ESTCluster/</a> |

**Supplementary material Table S2 (continued).** List of species genomes of which were analyzed *in silico* in present study and the sources of the ESTs and/or genomic sequences.

| Class          | Order        | Family        | Species                                        | Organization: Web link                                                                                  |
|----------------|--------------|---------------|------------------------------------------------|---------------------------------------------------------------------------------------------------------|
| Eudicotyledons | Ranunculales | Ranunculaceae | <i>Aquilegia formosa x Aquilegia pubescens</i> | PlantGDB: <a href="http://www.plantgdb.org/prj/ESTCluster/">http://www.plantgdb.org/prj/ESTCluster/</a> |
|                |              | Papaveraceae  | <i>Papaver somniferum</i>                      | PlantGDB: <a href="http://www.plantgdb.org/prj/ESTCluster/">http://www.plantgdb.org/prj/ESTCluster/</a> |
|                | Malvales     | Malvaceae     | <i>Gossypium arboreum</i>                      | PlantGDB: <a href="http://www.plantgdb.org/prj/ESTCluster/">http://www.plantgdb.org/prj/ESTCluster/</a> |
|                |              |               | <i>Gossypium hirsutum</i>                      | PlantGDB: <a href="http://www.plantgdb.org/prj/ESTCluster/">http://www.plantgdb.org/prj/ESTCluster/</a> |
|                |              |               | <i>Gossypium raimondii</i>                     | PlantGDB: <a href="http://www.plantgdb.org/prj/ESTCluster/">http://www.plantgdb.org/prj/ESTCluster/</a> |
|                |              |               | <i>Theobroma cacao</i>                         | PlantGDB: <a href="http://www.plantgdb.org/prj/ESTCluster/">http://www.plantgdb.org/prj/ESTCluster/</a> |

# Supplementary Material Figure S1

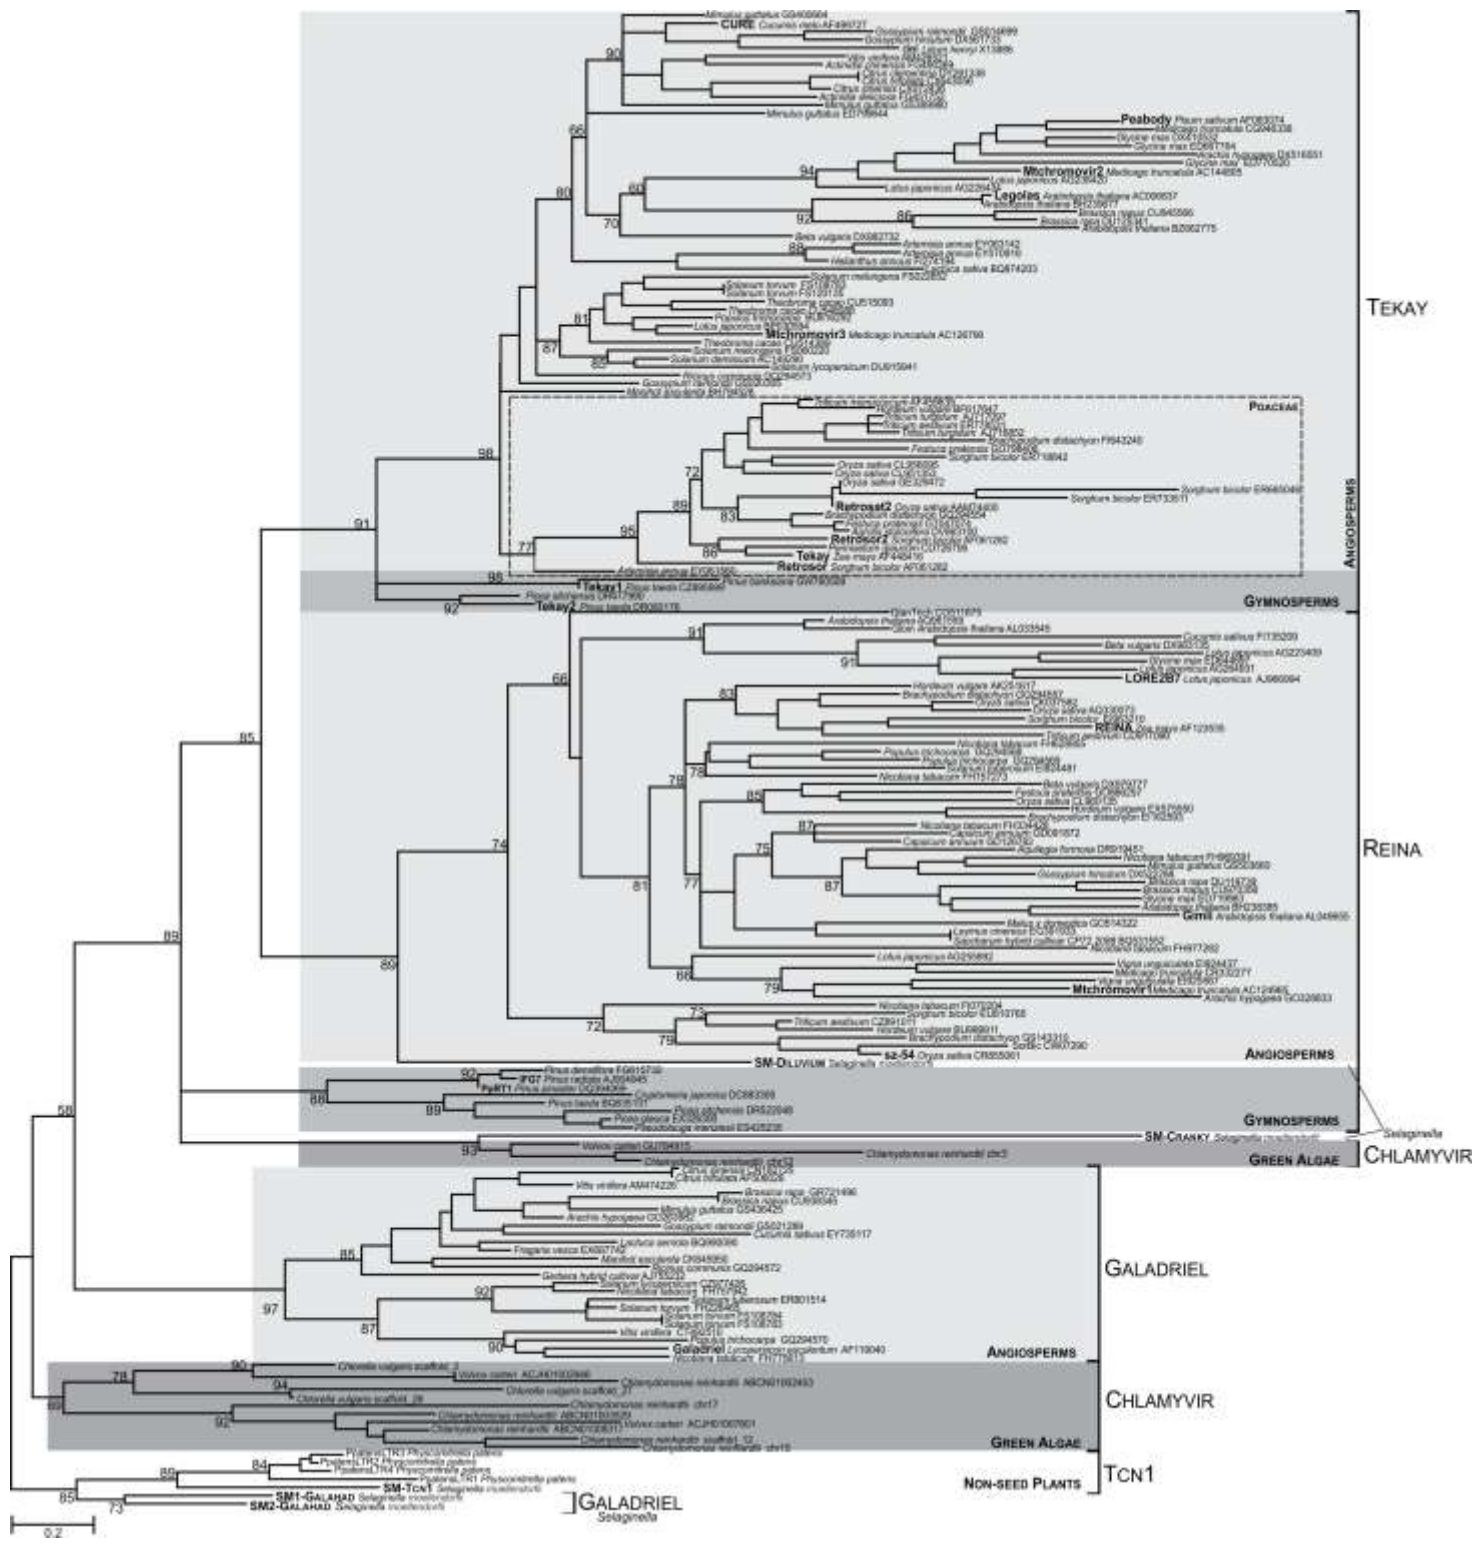





# Supplementary Material Dataset S1

## Analysis of CHD tree

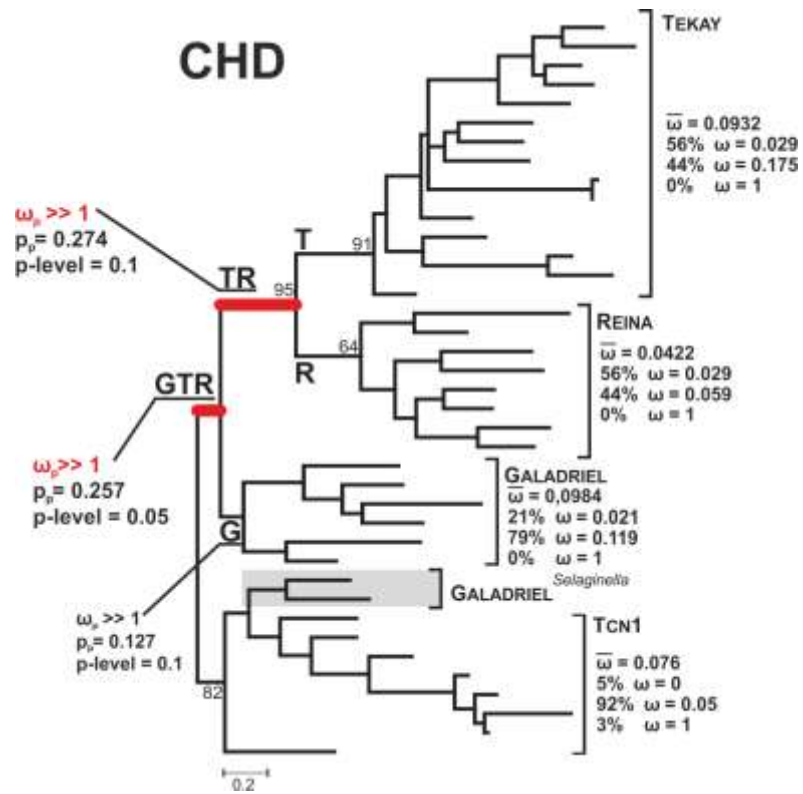

**Branch-site tests.**

**(2.71 (0.05 level); 5.41 (0.01 level) – Null 2 vs Positive**

**3.84 (0.05 level); 6.63 (0.01 level) – Null 1 vs Null 2)**

**Branch-site test for positive selection at the base of T clade.**

| Model              | lnL          | Significant | Class 0                                                     | Class 1                                                     | Class 2a                                                      | Class 2b                                                      |
|--------------------|--------------|-------------|-------------------------------------------------------------|-------------------------------------------------------------|---------------------------------------------------------------|---------------------------------------------------------------|
| Null 1 (M1a)       | -5994.608301 |             | p = 0.96436<br>$\omega = 0.07057$                           | p = 0.03564<br>$\omega = 1.00000$                           |                                                               |                                                               |
| Null 2 (neutral)   | -5993.232546 | 2.75151     | p = 0.73553<br>$\omega_b = 0.06950$<br>$\omega_f = 0.06950$ | p = 0.02732<br>$\omega_b = 1.00000$<br>$\omega_f = 1.00000$ | p = 0.22865<br>$\omega_b = 0.06950$<br>$\omega_f = 1.00000$   | p = 0.00849<br>$\omega_b = 1.00000$<br>$\omega_f = 1.00000$   |
| Positive Selection | -5992.415185 | 1.634722    | p = 0.71854<br>$\omega_b = 0.07183$<br>$\omega_f = 0.07183$ | p = 0.02675<br>$\omega_b = 1.00000$<br>$\omega_f = 1.00000$ | p = 0.24557<br>$\omega_b = 0.07183$<br>$\omega_f = 999.00000$ | p = 0.00914<br>$\omega_b = 1.00000$<br>$\omega_f = 999.00000$ |

**Naive Empirical Bayes (NEB) analysis; positive sites for foreground lineages Prob(w>1):**

6 E 0.656  
 14 I 0.894  
 16 R 0.975\*  
 24 E 0.974\*  
 26 L 0.997\*\*  
 28 K 0.900  
 31 G 0.592  
 45 L 0.651  
 53 E 0.954\*

**Bayes Empirical Bayes (BEB) analysis [73]; positive sites for foreground lineages Prob(w>1):**

|            |            |            |            |            |            |
|------------|------------|------------|------------|------------|------------|
| 1 * 0.600  | 12 R 0.588 | 23 T 0.605 | 34 E 0.607 | 45 L 0.806 | 56 R 0.600 |
| 2 D 0.600  | 13 V 0.600 | 24 E 0.811 | 35 S 0.612 | 46 W 0.588 | 57 A 0.600 |
| 3 K 0.620  | 14 I 0.868 | 25 Y 0.589 | 36 E 0.577 | 47 Q 0.634 | 58 E 0.600 |
| 4 E 0.594  | 15 R 0.582 | 26 L 0.948 | 37 A 0.584 | 48 F 0.590 | 59 G 0.600 |
| 5 V 0.591  | 16 R 0.897 | 27 V 0.588 | 38 S 0.586 | 49 Q 0.595 | 60 A 0.600 |
| 6 E 0.783  | 17 R 0.590 | 28 K 0.785 | 39 W 0.588 | 50 E 0.591 | 61 T 0.600 |
| 7 I 0.602  | 18 G 0.611 | 29 W 0.588 | 40 E 0.575 | 51 Q 0.593 | 62 R 0.600 |
| 8 I 0.583  | 19 V 0.595 | 30 K 0.628 | 41 P 0.591 | 52 I 0.642 | 63 T 0.600 |
| 9 L 0.589  | 20 P 0.596 | 31 G 0.676 | 42 A 0.595 | 53 E 0.760 | 64 S 0.600 |
| 10 A 0.575 | 21 P 0.611 | 32 L 0.590 | 43 G 0.584 | 54 R 0.585 | 65 A 0.600 |
| 11 D 0.591 | 22 A 0.600 | 33 P 0.710 | 44 A 0.581 | 55 F 0.600 | 66 A 0.600 |

**Branch-site test for positive selection at the base of R clade.**

| Model              | lnL          | Significant | Class 0                                                     | Class 1                                                     | Class 2a                                                     | Class 2b                                                     |
|--------------------|--------------|-------------|-------------------------------------------------------------|-------------------------------------------------------------|--------------------------------------------------------------|--------------------------------------------------------------|
| Null 1 (M1a)       | -5994.608301 |             | p = 0.96436<br>$\omega = 0.07057$                           | p = 0.03564<br>$\omega = 1.00000$                           |                                                              |                                                              |
| Null 2 (neutral)   | -5993.469959 | 2.276684    | p = 0.73773<br>$\omega_b = 0.06975$<br>$\omega_f = 0.06975$ | p = 0.02736<br>$\omega_b = 1.00000$<br>$\omega_f = 1.00000$ | p = 0.22651<br>$\omega_b = 0.06975$<br>$\omega_f = 1.00000$  | p = 0.00840<br>$\omega_b = 1.00000$<br>$\omega_f = 1.00000$  |
| Positive Selection | -5992.910964 | 1.11799     | p = 0.69307<br>$\omega_b = 0.07074$<br>$\omega_f = 0.07074$ | p = 0.02571<br>$\omega_b = 1.00000$<br>$\omega_f = 1.00000$ | p = 0.27116<br>$\omega_b = 0.07074$<br>$\omega_f = 19.50879$ | p = 0.01006<br>$\omega_b = 1.00000$<br>$\omega_f = 19.50879$ |

**Naive Empirical Bayes (NEB) analysis; positive sites for foreground lineages Prob(w>1):**

```

3 K 0.885
7 I 0.776
17 R 0.509
18 G 0.655
20 P 0.513
32 L 0.765
41 P 0.969*
42 A 0.967*
46 W 0.655
49 Q 0.557
51 Q 0.812
54 R 0.970*
55 F 0.722

```

**Bayes Empirical Bayes (BEB) analysis [73]; positive sites for foreground lineages Prob(w>1):**

|              |             |
|--------------|-------------|
| 3 K 0.945    | 46 W 0.792  |
| 7 I 0.619    | 49 Q 0.727  |
| 17 R 0.685   | 51 Q 0.874  |
| 18 G 0.847   | 53 E 0.558  |
| 20 P 0.666   | 54 R 0.988* |
| 21 P 0.628   | 55 F 0.833  |
| 27 V 0.594   | 56 R 0.600  |
| 32 L 0.857   |             |
| 41 P 0.990** |             |
| 42 A 0.990** |             |

**Branch-site test for positive selection at the base of G clade.**

| Model              | lnL          | Significant | Class 0                                                     | Class 1                                                     | Class 2a                                                      | Class 2b                                                      |
|--------------------|--------------|-------------|-------------------------------------------------------------|-------------------------------------------------------------|---------------------------------------------------------------|---------------------------------------------------------------|
| Null 1 (M1a)       | -5994.608301 |             | p = 0.96436<br>$\omega = 0.07057$                           | p = 0.03564<br>$\omega = 1.00000$                           |                                                               |                                                               |
| Null 2 (neutral)   | -5993.843327 | 1.529948    | p = 0.83878<br>$\omega_b = 0.06896$<br>$\omega_f = 0.06896$ | p = 0.03114<br>$\omega_b = 1.00000$<br>$\omega_f = 1.00000$ | p = 0.12542<br>$\omega_b = 0.06896$<br>$\omega_f = 1.00000$   | p = 0.00466<br>$\omega_b = 1.00000$<br>$\omega_f = 1.00000$   |
| Positive Selection | -5991.460278 | 4.766098    | p = 0.84189<br>$\omega_b = 0.07093$<br>$\omega_f = 0.07093$ | p = 0.03127<br>$\omega_b = 1.00000$<br>$\omega_f = 1.00000$ | p = 0.12229<br>$\omega_b = 0.07093$<br>$\omega_f = 999.00000$ | p = 0.00454<br>$\omega_b = 1.00000$<br>$\omega_f = 999.00000$ |

Naive Empirical Bayes (NEB) analysis; positive sites for foreground lineages Prob(w>1):

21 P 0.660  
46 W 0.854  
48 F 0.971\*  
49 Q 0.923

Bayes Empirical Bayes (BEB) analysis [73]; positive sites for foreground lineages Prob(w>1):

2 D 0.539  
20 P 0.529  
21 P 0.651  
23 T 0.553  
24 E 0.506  
46 W 0.834  
48 F 0.831  
49 Q 0.782  
51 Q 0.530  
52 I 0.561  
58 E 0.509

**Branch-site test for positive selection at the base of TR clade.**

| Model              | lnL          | Significant | Class 0                                                     | Class 1                                                     | Class 2a                                                      | Class 2b                                                      |
|--------------------|--------------|-------------|-------------------------------------------------------------|-------------------------------------------------------------|---------------------------------------------------------------|---------------------------------------------------------------|
| Null 1 (M1a)       | -5994.608301 |             | p = 0.96436<br>$\omega = 0.07057$                           | p = 0.03564<br>$\omega = 1.00000$                           |                                                               |                                                               |
| Null 2 (neutral)   | -5992.115488 | 4.985626    | p = 0.71615<br>$\omega_b = 0.06855$<br>$\omega_f = 0.06855$ | p = 0.02664<br>$\omega_b = 1.00000$<br>$\omega_f = 1.00000$ | p = 0.24798<br>$\omega_b = 0.06855$<br>$\omega_f = 1.00000$   | p = 0.00923<br>$\omega_b = 1.00000$<br>$\omega_f = 1.00000$   |
| Positive Selection | -5990.255016 | 3.720944    | p = 0.70023<br>$\omega_b = 0.07199$<br>$\omega_f = 0.07199$ | p = 0.02601<br>$\omega_b = 1.00000$<br>$\omega_f = 1.00000$ | p = 0.26395<br>$\omega_b = 0.07199$<br>$\omega_f = 999.00000$ | p = 0.00981<br>$\omega_b = 1.00000$<br>$\omega_f = 999.00000$ |

Naive Empirical Bayes (NEB) analysis; positive sites for foreground lineages Prob(w>1):

```

5 V 0.998**
11 D 0.836
25 Y 0.805
48 F 0.992**
49 Q 0.665
50 E 0.996**
52 I 0.533
53 E 0.871

```

Bayes Empirical Bayes (BEB) analysis [73]; positive sites for foreground lineages Prob(w>1):

|             |            |             |
|-------------|------------|-------------|
| 1 * 0.599   | 23 T 0.667 | 45 L 0.566  |
| 2 D 0.599   | 24 E 0.726 | 46 W 0.589  |
| 3 K 0.695   | 25 Y 0.932 | 47 Q 0.564  |
| 4 E 0.582   | 26 L 0.574 | 48 F 0.966* |
| 5 V 0.995** | 27 V 0.548 | 49 Q 0.677  |
| 6 E 0.527   | 28 K 0.725 | 50 E 0.990* |
| 7 I 0.616   | 29 W 0.548 | 51 Q 0.736  |
| 8 I 0.527   | 30 K 0.659 | 52 I 0.805  |
| 9 L 0.551   | 31 G 0.550 | 53 E 0.815  |
| 11 D 0.926  | 32 L 0.579 | 54 R 0.541  |
| 12 R 0.549  | 33 P 0.609 | 55 F 0.633  |
| 13 V 0.599  | 34 E 0.538 | 56 R 0.697  |
| 14 I 0.561  | 35 S 0.648 | 57 A 0.592  |
| 15 R 0.528  | 36 E 0.514 | 58 E 0.621  |
| 16 R 0.551  | 37 A 0.533 | 59 G 0.550  |
| 17 R 0.557  | 38 S 0.554 | 60 A 0.599  |
| 18 G 0.610  | 39 W 0.548 | 61 T 0.599  |
| 19 V 0.553  | 41 P 0.581 | 62 R 0.599  |
| 20 P 0.686  | 42 A 0.567 | 63 T 0.599  |
| 21 P 0.681  | 43 G 0.574 | 64 S 0.599  |
| 22 A 0.599  | 44 A 0.520 | 65 A 0.599  |
|             |            | 66 A 0.599  |

**Branch-sites test for positive selection at the base of GTR clade.**

| Model | lnL | Significant | Class 0 | Class 1 | Class 2a | Class 2b |
|-------|-----|-------------|---------|---------|----------|----------|
|-------|-----|-------------|---------|---------|----------|----------|

|                    |              |          |                                                             |                                                             |                                                               |                                                               |
|--------------------|--------------|----------|-------------------------------------------------------------|-------------------------------------------------------------|---------------------------------------------------------------|---------------------------------------------------------------|
| Null 1 (M1a)       | -5994.608301 |          | p = 0.96436<br>$\omega$ = 0.07057                           | p = 0.03564<br>$\omega$ = 1.00000                           |                                                               |                                                               |
| Null 2 (neutral)   | -5992.166788 | 4.883026 | p = 0.72582<br>$\omega_b$ = 0.06740<br>$\omega_f$ = 0.06740 | p = 0.02699<br>$\omega_b$ = 1.00000<br>$\omega_f$ = 1.00000 | p = 0.23832<br>$\omega_b$ = 0.06740<br>$\omega_f$ = 1.00000   | p = 0.00886<br>$\omega_b$ = 1.00000<br>$\omega_f$ = 1.00000   |
| Positive Selection | -5989.340762 | 5.652052 | p = 0.71684<br>$\omega_b$ = 0.07097<br>$\omega_f$ = 0.07097 | p = 0.02660<br>$\omega_b$ = 1.00000<br>$\omega_f$ = 1.00000 | p = 0.24738<br>$\omega_b$ = 0.07097<br>$\omega_f$ = 999.00000 | p = 0.00918<br>$\omega_b$ = 1.00000<br>$\omega_f$ = 999.00000 |

Naive Empirical Bayes (NEB) analysis; positive sites for foreground lineages Prob(w>1):

3 K 0.969\*  
19 V 0.665  
21 P 0.514  
23 T 0.853  
32 L 0.943  
46 W 0.986\*  
47 Q 0.928  
48 F 0.999\*\*  
49 Q 0.967\*  
51 Q 0.932

Bayes Empirical Bayes (BEB) analysis [73]; positive sites for foreground lineages Prob(w>1):

|            |            |              |            |
|------------|------------|--------------|------------|
| 1 * 0.612  | 19 V 0.785 | 37 A 0.610   | 55 F 0.574 |
| 2 D 0.824  | 20 P 0.688 | 38 S 0.573   | 56 R 0.586 |
| 3 K 0.972* | 21 P 0.696 | 39 W 0.572   | 57 A 0.697 |
| 4 E 0.530  | 22 A 0.612 | 40 E 0.528   | 58 E 0.623 |
| 5 V 0.569  | 23 T 0.814 | 41 P 0.572   | 59 G 0.612 |
| 6 E 0.533  | 24 E 0.549 | 42 A 0.588   | 60 A 0.612 |
| 7 I 0.624  | 25 Y 0.574 | 43 G 0.578   | 61 T 0.612 |
| 8 I 0.556  | 26 L 0.575 | 44 A 0.584   | 62 R 0.612 |
| 9 L 0.574  | 27 V 0.563 | 45 L 0.575   | 63 T 0.612 |
| 10 A 0.531 | 28 K 0.556 | 46 W 0.960*  | 64 S 0.612 |
| 11 D 0.621 | 29 W 0.572 | 47 Q 0.964*  | 65 A 0.612 |
| 12 R 0.574 | 30 K 0.547 | 48 F 0.996** | 66 A 0.612 |
| 13 V 0.612 | 31 G 0.556 | 49 Q 0.907   |            |
| 14 I 0.585 | 32 L 0.932 | 50 E 0.579   |            |
| 15 R 0.577 | 33 P 0.627 | 51 Q 0.963*  |            |
| 16 R 0.561 | 34 E 0.571 | 52 I 0.825   |            |
| 17 R 0.584 | 35 S 0.572 | 53 E 0.603   |            |
| 18 G 0.596 | 36 E 0.577 | 54 R 0.588   |            |

### Corrections for Multiple Testing

| Foreground branch                  | base of T clade | base of R clade | base of G clade | base of TR clade | base of GTR clade |
|------------------------------------|-----------------|-----------------|-----------------|------------------|-------------------|
| $2\Delta l$                        | 1.634722        | 1.11799         | 4.766098        | 3.720944         | 5.652052          |
| $p_{\chi^2_i}$                     | .201051         | .290352         | .029026         | .053734          | .017435           |
| Hommel procedure<br>$\alpha = 0.1$ | TRUE            | TRUE            | TRUE            | TRUE             | <b>FALSE</b>      |

|                                     |         |         |              |              |              |
|-------------------------------------|---------|---------|--------------|--------------|--------------|
| Hommel procedure<br>$\alpha = 0.05$ | TRUE    | TRUE    | TRUE         | TRUE         | TRUE         |
| Hommel procedure<br>$\alpha = 0.01$ | TRUE    | TRUE    | TRUE         | TRUE         | TRUE         |
| $P_{1/2\chi_0^2+1/2\chi_1^2}$       | 0.10053 | 0.14518 | 0.01451      | 0.02687      | 0.00872      |
| Hommel procedure<br>$\alpha = 0.1$  | TRUE    | TRUE    | <b>FALSE</b> | <b>FALSE</b> | FALSE        |
| Hommel procedure<br>$\alpha = 0.05$ | TRUE    | TRUE    | TRUE         | TRUE         | <b>FALSE</b> |
| Hommel procedure<br>$\alpha = 0.01$ | TRUE    | TRUE    | TRUE         | TRUE         | TRUE         |



**Clade tests with several branch types (Yang's Model C).**

| Model                | lnL          | Significant    | Class 0                                 | Class 1                                 | Class 2                                                                                                                                                                                                    |
|----------------------|--------------|----------------|-----------------------------------------|-----------------------------------------|------------------------------------------------------------------------------------------------------------------------------------------------------------------------------------------------------------|
| Null 1 (M1a) (np=77) | -5994.608301 |                | p = 0.96436<br>$\omega$ = 0.07057       | p = 0.03564<br>$\omega$ = 1.00000       |                                                                                                                                                                                                            |
| Model C (np=84)      | -5940.930269 | Yes (vs Null1) | p = 0.04666<br>$\omega_{ALL}$ = 0.00000 | p = 0.03336<br>$\omega_{ALL}$ = 1.00000 | p = 0.91999<br>$\omega_{TCN, REINA, GALADRIEL, TEKAY}$<br>= 0.08036<br>$\omega_{GTR}$ = 999.00000<br>$\omega_G$ = 0.02933<br>$\omega_{TR}$ = 999.00000<br>$\omega_T$ = 999.00000<br>$\omega_R$ = 999.00000 |

**Clade-sites test (Yang's Model C). (df = 3; 7.81 (0.05 level); 11.34 (0.01 level))**

Clade-sites test (Yang's Model C) comparing TEKAY to REINA

| Model                  | lnL          | Significant | Class 0                                                                               | Class 1                                                                               | Class 2                                                                               |
|------------------------|--------------|-------------|---------------------------------------------------------------------------------------|---------------------------------------------------------------------------------------|---------------------------------------------------------------------------------------|
| Null 1 (M1a) (np = 46) | -3517.498312 |             | p = 0.63068<br>$\omega = 0.15566$                                                     | p = 0.36932<br>$\omega = 1.00000$                                                     |                                                                                       |
| Model C (np = 49)      | -3444.092199 | Yes         | p = 0.55513<br>$\omega_{\text{TEKAY}} = 0.02851$<br>$\omega_{\text{REINA}} = 0.02851$ | p = 0.00000<br>$\omega_{\text{TEKAY}} = 1.00000$<br>$\omega_{\text{REINA}} = 1.00000$ | p = 0.44487<br>$\omega_{\text{TEKAY}} = 0.17503$<br>$\omega_{\text{REINA}} = 0.05868$ |

Clade-sites test (Yang's Model C) comparing GALADRIEL to TEKAY/REINA

| Model                  | lnL          | Significant | Class 0                                                                                         | Class 1                                                                                         | Class 2                                                                                         |
|------------------------|--------------|-------------|-------------------------------------------------------------------------------------------------|-------------------------------------------------------------------------------------------------|-------------------------------------------------------------------------------------------------|
| Null 1 (M1a) (np = 58) | -4631.687679 |             | p = 0.96823<br>$\omega = 0.07746$                                                               | p = 0.03177<br>$\omega = 1.00000$                                                               |                                                                                                 |
| Model C (np = 61)      | -4567.327157 | Yes         | p = 0.20856<br>$\omega_{\text{TEKAY/REINA}} = 0.02110$<br>$\omega_{\text{GALADRIEL}} = 0.02110$ | p = 0.00000<br>$\omega_{\text{TEKAY/REINA}} = 1.00000$<br>$\omega_{\text{GALADRIEL}} = 1.00000$ | p = 0.79144<br>$\omega_{\text{TEKAY/REINA}} = 0.10610$<br>$\omega_{\text{GALADRIEL}} = 0.11909$ |

Clade-sites test (Yang's Model C) comparing TCN to GALADRIEL/TEKAY/REINA

| Model             | lnL          | Significant | Class 0                                                                                             | Class 1                                                                                             | Class 2                                                                                             |
|-------------------|--------------|-------------|-----------------------------------------------------------------------------------------------------|-----------------------------------------------------------------------------------------------------|-----------------------------------------------------------------------------------------------------|
| Null 1 (M1a)      | -5994.608301 |             | p = 0.96436<br>$\omega = 0.07057$                                                                   | p = 0.03564<br>$\omega = 1.00000$                                                                   |                                                                                                     |
| Model C (np = 80) | -5940.757189 | Yes         | p = 0.04667<br>$\omega_{\text{TCN}} = 0.00000$<br>$\omega_{\text{GALADRIEL/TEKAY/REINA}} = 0.00000$ | p = 0.03243<br>$\omega_{\text{TCN}} = 1.00000$<br>$\omega_{\text{GALADRIEL/TEKAY/REINA}} = 1.00000$ | p = 0.92091<br>$\omega_{\text{TCN}} = 0.04987$<br>$\omega_{\text{GALADRIEL/TEKAY/REINA}} = 0.08886$ |

# Analysis of int tree

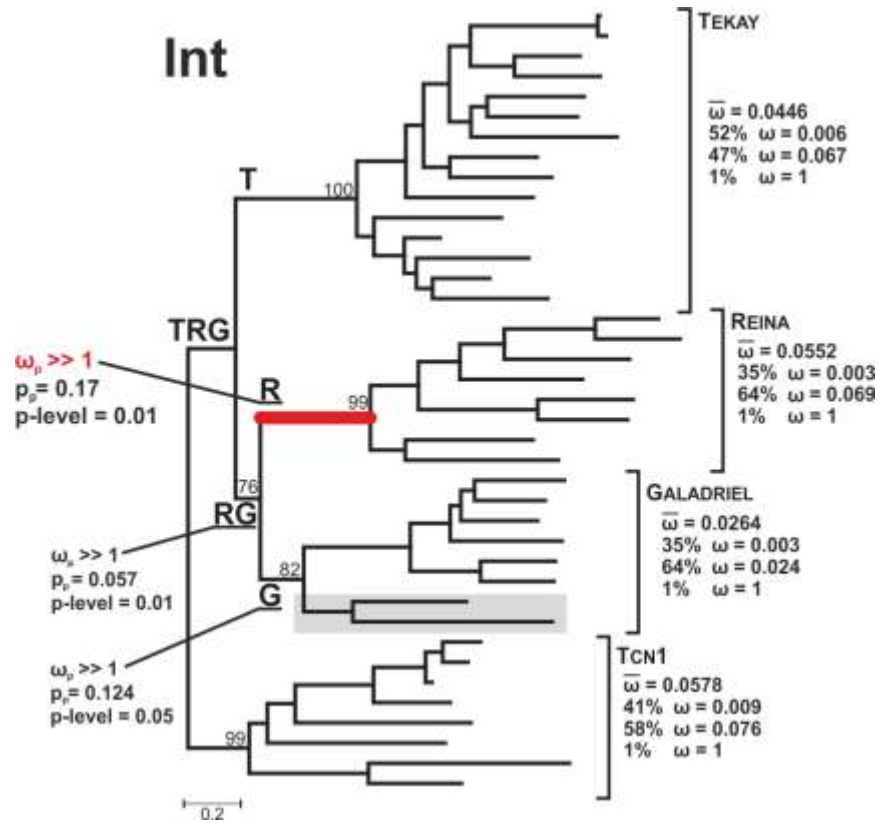

**Branch-site tests.****(2.71 (0.05 level); 5.41 (0.01 level) – Null 2 vs Positive****3.84 (0.05 level); 6.63 (0.01 level) – Null 1 vs Null 2)**

Branch-site test for positive selection at the base of T clade.

| Model              | lnL           | Significant | Class 0                                                     | Class 1                                                     | Class 2a                                                    | Class 2b                                                    |
|--------------------|---------------|-------------|-------------------------------------------------------------|-------------------------------------------------------------|-------------------------------------------------------------|-------------------------------------------------------------|
| Null 1 (M1a)       | -13195.288420 |             | p = 0.96147<br>$\omega = 0.04686$                           | p = 0.03853<br>$\omega = 1.00000$                           |                                                             |                                                             |
| Null 2 (neutral)   | -13187.570487 | 15.435866   | p = 0.80915<br>$\omega_b = 0.04588$<br>$\omega_f = 0.04588$ | p = 0.03326<br>$\omega_b = 1.00000$<br>$\omega_f = 1.00000$ | p = 0.15136<br>$\omega_b = 0.04588$<br>$\omega_f = 1.00000$ | p = 0.00622<br>$\omega_b = 1.00000$<br>$\omega_f = 1.00000$ |
| Positive Selection | -13186.968977 | 1.20302     | p = 0.83657<br>$\omega_b = 0.04723$<br>$\omega_f = 0.04723$ | p = 0.03492<br>$\omega_b = 1.00000$<br>$\omega_f = 1.00000$ | p = 0.12336<br>$\omega_b = 0.04723$<br>$\omega_f = 2.72294$ | p = 0.00515<br>$\omega_b = 1.00000$<br>$\omega_f = 2.72294$ |

Naive Empirical Bayes (NEB) analysis; positive sites for foreground lineages Prob(w&gt;1):

5 V 0.978\*  
 22 F 0.529  
 28 M 0.534  
 43 L 0.573  
 87 F 0.941  
 89 M 0.858  
 118 Y 0.998\*\*  
 121 C 0.977\*  
 124 F 0.968\*  
 127 P 0.933  
 133 A 0.787

Bayes Empirical Bayes (BEB) analysis [73]; positive sites for foreground lineages Prob(w&gt;1):

5 V 0.975\*  
 28 M 0.505  
 43 L 0.551  
 87 F 0.933  
 89 M 0.842  
 118 Y 0.998\*\*  
 121 C 0.975\*  
 124 F 0.964\*  
 127 P 0.920  
 133 A 0.785

Branch-site test for positive selection at the base of R clade.

| Model              | lnL           | Significant | Class 0                                                     | Class 1                                                     | Class 2a                                                      | Class 2b                                                      |
|--------------------|---------------|-------------|-------------------------------------------------------------|-------------------------------------------------------------|---------------------------------------------------------------|---------------------------------------------------------------|
| Null 1 (M1a)       | -13195.288420 |             | p = 0.96147<br>$\omega = 0.04686$                           | p = 0.03853<br>$\omega = 1.00000$                           |                                                               |                                                               |
| Null 2 (neutral)   | -13186.728575 | 17.11969    | p = 0.80964<br>$\omega_b = 0.04324$<br>$\omega_f = 0.04324$ | p = 0.03186<br>$\omega_b = 1.00000$<br>$\omega_f = 1.00000$ | p = 0.15250<br>$\omega_b = 0.04324$<br>$\omega_f = 1.00000$   | p = 0.00600<br>$\omega_b = 1.00000$<br>$\omega_f = 1.00000$   |
| Positive Selection | -13181.218118 | 11.020914   | p = 0.79655<br>$\omega_b = 0.04839$<br>$\omega_f = 0.04839$ | p = 0.03335<br>$\omega_b = 1.00000$<br>$\omega_f = 1.00000$ | p = 0.16326<br>$\omega_b = 0.04839$<br>$\omega_f = 999.00000$ | p = 0.00684<br>$\omega_b = 1.00000$<br>$\omega_f = 999.00000$ |

Naive Empirical Bayes (NEB) analysis; positive sites for foreground lineages Prob( $w > 1$ ):

```

3 E 0.598
8 D 0.615
10 T 0.532
37 Y 0.959*
43 L 0.976*
45 A 1.000**
46 D 0.751
55 A 0.998**
69 S 0.994**
77 V 0.999**
80 S 0.586
85 H 0.536
114 C 0.999**
117 M 0.990*
122 F 0.872
123 T 0.532
124 F 0.748
127 P 0.969*
129 T 0.955*
133 A 0.988*

```

Bayes Empirical Bayes (BEB) analysis [73]; positive sites for foreground lineages Prob( $w > 1$ ):

```

1 I 0.525
2 P 0.533
3 E 0.822
4 Q 0.637
5 V 0.539
6 W 0.536
7 D 0.683
8 D 0.673
9 V 0.530
10 T 0.714
11 M 0.505
12 D 0.516
13 F 0.520
14 I 0.520
15 T 0.558
16 G 0.530
17 L 0.533

```

18 P 0.533  
19 L 0.556  
20 S 0.534  
21 \* 0.558  
22 F 0.541  
23 G 0.530  
24 F 0.531  
25 T 0.519  
26 V 0.558  
27 I 0.519  
28 M 0.537  
29 V 0.525  
30 V 0.533  
31 V 0.525  
32 D 0.516  
33 R 0.538  
34 L 0.526  
35 S 0.532  
36 K 0.521  
37 Y 0.725  
38 A 0.527  
39 H 0.523  
40 F 0.519  
41 M 0.539  
42 P 0.533  
43 L 0.874  
44 K 0.555  
45 A 0.998\*\*  
46 D 0.803  
47 Y 0.526  
48 S 0.538  
49 N 0.527  
50 R 0.706  
51 T 0.625  
52 V 0.538  
53 A 0.527  
54 E 0.526  
55 A 0.979\*  
56 F 0.520  
57 V 0.566  
58 N 0.558  
59 Y 0.622  
60 V 0.526  
61 V 0.526  
62 K 0.598  
63 L 0.539  
64 H 0.523  
65 G 0.530  
66 M 0.577  
67 P 0.533  
68 K 0.624  
69 S 0.919  
70 I 0.520  
71 I 0.527  
72 S 0.533  
73 D 0.516  
74 R 0.536  
75 D 0.534  
76 K 0.623

77 V 0.976\*  
78 F 0.520  
79 T 0.540  
80 S 0.629  
81 K 0.535  
82 F 0.520  
83 W 0.535  
84 Q 0.644  
85 H 0.601  
86 L 0.533  
87 F 0.520  
88 Q 0.525  
89 M 0.545  
90 Q 0.540  
91 G 0.534  
92 T 0.530  
93 T 0.522  
94 L 0.534  
95 S 0.571  
96 M 0.561  
97 S 0.525  
98 T 0.528  
99 T 0.528  
100 Y 0.530  
101 H 0.524  
102 P 0.533  
103 Q 0.531  
104 T 0.528  
105 D 0.516  
106 G 0.531  
107 Q 0.531  
108 S 0.528  
109 E 0.521  
110 A 0.543  
111 V 0.540  
112 N 0.516  
113 K 0.539  
114 C 0.986\*  
115 L 0.540  
116 E 0.521  
117 M 0.912  
118 Y 0.529  
119 L 0.533  
120 R 0.532  
121 C 0.534  
122 F 0.821  
123 T 0.632  
124 F 0.708  
125 K 0.521  
126 N 0.532  
127 P 0.975\*  
128 K 0.577  
129 T 0.932  
130 W 0.535  
131 F 0.547  
132 K 0.551  
133 A 0.935  
134 L 0.533  
135 T 0.533

136 W 0.535  
137 V 0.528  
138 E 0.521  
139 L 0.519  
140 W 0.714  
141 Y 0.529  
142 N 0.516



Branch-site test for positive selection at the base of G clade.

| Model              | lnL           | Significant | Class 0                                                     | Class 1                                                     | Class 2a                                                      | Class 2b                                                      |
|--------------------|---------------|-------------|-------------------------------------------------------------|-------------------------------------------------------------|---------------------------------------------------------------|---------------------------------------------------------------|
| Null 1 (M1a)       | -13195.288420 |             | p = 0.96147<br>$\omega = 0.04686$                           | p = 0.03853<br>$\omega = 1.00000$                           |                                                               |                                                               |
| Null 2 (neutral)   | -13191.650894 | 7.275052    | p = 0.85179<br>$\omega_b = 0.04515$<br>$\omega_f = 0.04515$ | p = 0.03371<br>$\omega_b = 1.00000$<br>$\omega_f = 1.00000$ | p = 0.11014<br>$\omega_b = 0.04515$<br>$\omega_f = 1.00000$   | p = 0.00436<br>$\omega_b = 1.00000$<br>$\omega_f = 1.00000$   |
| Positive Selection | -13188.845227 | 5.611334    | p = 0.84166<br>$\omega_b = 0.04762$<br>$\omega_f = 0.04762$ | p = 0.03405<br>$\omega_b = 1.00000$<br>$\omega_f = 1.00000$ | p = 0.11946<br>$\omega_b = 0.04762$<br>$\omega_f = 999.00000$ | p = 0.00483<br>$\omega_b = 1.00000$<br>$\omega_f = 999.00000$ |

Naive Empirical Bayes (NEB) analysis; positive sites for foreground lineages Prob(w>1):

```

8 D 0.634
35 S 0.919
43 L 0.761
46 D 0.677
57 V 0.559
69 S 0.614
77 V 0.715
80 S 0.593
84 Q 0.533
113 K 0.988*
114 C 0.669
123 T 0.913
124 F 0.569
125 K 0.685
128 K 0.671
135 T 1.000**

```

Bayes Empirical Bayes (BEB) analysis [73]; positive sites for foreground lineages Prob(w>1):

```

35 S 0.799
77 V 0.531
113 K 0.610
123 T 0.537
125 K 0.577
135 T 0.898

```

Branch-site test for positive selection at the base of RG clade.

| Model              | lnL           | Significant | Class 0                                                     | Class 1                                                     | Class 2a                                                      | Class 2b                                                      |
|--------------------|---------------|-------------|-------------------------------------------------------------|-------------------------------------------------------------|---------------------------------------------------------------|---------------------------------------------------------------|
| Null 1 (M1a)       | -13195.288420 |             | p = 0.96147<br>$\omega = 0.04686$                           | p = 0.03853<br>$\omega = 1.00000$                           |                                                               |                                                               |
| Null 2 (neutral)   | -13193.336471 | 3.903898    | p = 0.89858<br>$\omega_b = 0.04498$<br>$\omega_f = 0.04498$ | p = 0.03528<br>$\omega_b = 1.00000$<br>$\omega_f = 1.00000$ | p = 0.06364<br>$\omega_b = 0.04498$<br>$\omega_f = 1.00000$   | p = 0.00250<br>$\omega_b = 1.00000$<br>$\omega_f = 1.00000$   |
| Positive Selection | -13189.089754 | 8.493434    | p = 0.90584<br>$\omega_b = 0.04717$<br>$\omega_f = 0.04717$ | p = 0.03729<br>$\omega_b = 1.00000$<br>$\omega_f = 1.00000$ | p = 0.05461<br>$\omega_b = 0.04717$<br>$\omega_f = 999.00000$ | p = 0.00225<br>$\omega_b = 1.00000$<br>$\omega_f = 999.00000$ |

Naive Empirical Bayes (NEB) analysis; positive sites for foreground lineages Prob(w>1):

```

22 F 0.511
37 Y 0.837
80 S 0.999**
128 K 0.543
140 W 0.947

```

Bayes Empirical Bayes (BEB) analysis [73]; positive sites for foreground lineages Prob(w>1):

```

75 D 0.518
80 S 0.912
140 W 0.620

```

Branch-sites test for positive selection at the base of TRG clade.

| Model              | lnL           | Significant | Class 0                                                     | Class 1                                                     | Class 2a                                                     | Class 2b                                                     |
|--------------------|---------------|-------------|-------------------------------------------------------------|-------------------------------------------------------------|--------------------------------------------------------------|--------------------------------------------------------------|
| Null 1 (M1a)       | -13195.288420 |             | p = 0.96147<br>$\omega$ = 0.04686                           | p = 0.03853<br>$\omega$ = 1.00000                           |                                                              |                                                              |
| Null 2 (neutral)   | -13193.759756 | 3.057328    | p = 0.87726<br>$\omega_b$ = 0.04592<br>$\omega_f$ = 0.04592 | p = 0.03625<br>$\omega_b$ = 1.00000<br>$\omega_f$ = 1.00000 | p = 0.08306<br>$\omega_b$ = 0.04592<br>$\omega_f$ = 1.00000  | p = 0.00343<br>$\omega_b$ = 1.00000<br>$\omega_f$ = 1.00000  |
| Positive Selection | -13192.774806 | 1.9699      | p = 0.87443<br>$\omega_b$ = 0.04676<br>$\omega_f$ = 0.04676 | p = 0.03702<br>$\omega_b$ = 1.00000<br>$\omega_f$ = 1.00000 | p = 0.08495<br>$\omega_b$ = 0.04676<br>$\omega_f$ = 75.85586 | p = 0.00360<br>$\omega_b$ = 1.00000<br>$\omega_f$ = 75.85586 |

Naive Empirical Bayes (NEB) analysis; positive sites for foreground lineages Prob( $w > 1$ ):

8 D 0.945  
 37 Y 0.843  
 43 L 0.699  
 117 M 0.587  
 126 N 0.584  
 128 K 0.822  
 132 K 0.826  
 140 W 0.677

Bayes Empirical Bayes (BEB) analysis [73]; positive sites for foreground lineages Prob( $w > 1$ ):

8 D 0.907  
 37 Y 0.762  
 43 L 0.622  
 117 M 0.532  
 126 N 0.522  
 128 K 0.746  
 132 K 0.758  
 140 W 0.601

Corrections for Multiple Testing

| Foreground branch                   | base of T clade | base of R clade | base of G clade | base of RG clade | base of TRG clade |
|-------------------------------------|-----------------|-----------------|-----------------|------------------|-------------------|
| $2\Delta l$                         | 1.20302         | 11.020914       | 5.611334        | 8.493434         | 1.9699            |
| $P_{\chi_1^2}$                      | 0.272719        | 0.000901        | 0.017845        | 0.003564         | 0.160458          |
| Hommel procedure<br>$\alpha = 0.1$  | TRUE            | FALSE           | <b>FALSE</b>    | FALSE            | TRUE              |
| Hommel procedure<br>$\alpha = 0.05$ | TRUE            | FALSE           | TRUE            | <b>FALSE</b>     | TRUE              |
| Hommel procedure<br>$\alpha = 0.01$ | TRUE            | <b>FALSE</b>    | TRUE            | TRUE             | TRUE              |
| $P_{1/2\chi_0^2+1/2\chi_1^2}$       | 0.13636         | 0.00045         | 0.00892         | 0.00178          | 0.08023           |
| Hommel procedure<br>$\alpha = 0.1$  | TRUE            | FALSE           | FALSE           | FALSE            | TRUE              |
| Hommel procedure<br>$\alpha = 0.05$ | TRUE            | FALSE           | <b>FALSE</b>    | FALSE            | TRUE              |
| Hommel procedure<br>$\alpha = 0.01$ | TRUE            | <b>FALSE</b>    | TRUE            | <b>FALSE</b>     | TRUE              |

**Clade tests with several branch types (Yang's Model C).**

| Model                | lnL           | Significant | Class 0                                 | Class 1                                 | Class 2                                                                                                                                                                                           |
|----------------------|---------------|-------------|-----------------------------------------|-----------------------------------------|---------------------------------------------------------------------------------------------------------------------------------------------------------------------------------------------------|
| Null 1 (M1a) (np=77) | -13195.288420 |             | p = 0.96147<br>$\omega$ = 0.04686       | p = 0.03853<br>$\omega$ = 1.00000       |                                                                                                                                                                                                   |
| Model C (np=84)      | -12812.406941 | Yes         | p = 0.40931<br>$\omega_{ALL}$ = 0.00947 | p = 0.01283<br>$\omega_{ALL}$ = 1.00000 | p = 0.57786<br>$\omega_{TCN, REINA, GALADRIEL, TEKAY}$ = 0.06924<br>$\omega_{TRG}$ = 0.12593<br>$\omega_G$ = 0.06454<br>$\omega_{RG}$ = 0.00010<br>$\omega_T$ = 0.06671<br>$\omega_R$ = 999.00000 |

**Clade-sites test (Yang's Model C). (df = 3; 7.81 (0.05 level); 11.34 (0.01 level))**

Clade-sites test (Yang's Model C) comparing REINA to GALADRIEL

| Model             | lnL          | Significant | Class 0                                                                                   | Class 1                                                                                   | Class 2                                                                                   |
|-------------------|--------------|-------------|-------------------------------------------------------------------------------------------|-------------------------------------------------------------------------------------------|-------------------------------------------------------------------------------------------|
| Null 1 (M1a)      | -5856.502483 |             | p = 0.98481<br>$\omega$ = 0.01125                                                         | p = 0.01519<br>$\omega$ = 1.00000                                                         |                                                                                           |
| Model C (np = 36) | -5699.488755 | Yes         | p = 0.35473<br>$\omega_{\text{GALADRIEL}} = 0.00302$<br>$\omega_{\text{REINA}} = 0.00302$ | p = 0.00724<br>$\omega_{\text{GALADRIEL}} = 1.00000$<br>$\omega_{\text{REINA}} = 1.00000$ | p = 0.63803<br>$\omega_{\text{GALADRIEL}} = 0.02378$<br>$\omega_{\text{REINA}} = 0.06898$ |

Clade-sites test (Yang's Model C) comparing TEKAY to REINA/GALADRIEL

| Model             | lnL           | Significant | Class 0                                                                                         | Class 1                                                                                         | Class 2                                                                                         |
|-------------------|---------------|-------------|-------------------------------------------------------------------------------------------------|-------------------------------------------------------------------------------------------------|-------------------------------------------------------------------------------------------------|
| Null 1 (M1a)      | -10538.466732 |             | p = 0.97776<br>$\omega$ = 0.02219                                                               | p = 0.02224<br>$\omega$ = 1.00000                                                               |                                                                                                 |
| Model C (np = 65) | -10221.715021 | Yes         | p = 0.51611<br>$\omega_{\text{REINA/GALADRIEL}} = 0.00616$<br>$\omega_{\text{TEKAY}} = 0.00616$ | p = 0.00902<br>$\omega_{\text{REINA/GALADRIEL}} = 1.00000$<br>$\omega_{\text{TEKAY}} = 1.00000$ | p = 0.47488<br>$\omega_{\text{REINA/GALADRIEL}} = 0.02813$<br>$\omega_{\text{TEKAY}} = 0.06715$ |

Clade-sites test (Yang's Model C) comparing TCN to TEKAY/REINA/GALADRIEL

| Model            | lnL           | Significant | Class 0                                                                                             | Class 1                                                                                             | Class 2                                                                                             |
|------------------|---------------|-------------|-----------------------------------------------------------------------------------------------------|-----------------------------------------------------------------------------------------------------|-----------------------------------------------------------------------------------------------------|
| Null 1 (M1a)     | -13195.288420 |             | p = 0.96147<br>$\omega$ = 0.04686                                                                   | p = 0.03853<br>$\omega$ = 1.00000                                                                   |                                                                                                     |
| Model C (np =80) | -12819.241300 | Yes         | p = 0.41059<br>$\omega_{\text{TCN}} = 0.00934$<br>$\omega_{\text{TEKAY/REINA/GALADRIEL}} = 0.00934$ | p = 0.01281<br>$\omega_{\text{TCN}} = 1.00000$<br>$\omega_{\text{TEKAY/REINA/GALADRIEL}} = 1.00000$ | p = 0.57660<br>$\omega_{\text{TCN}} = 0.07643$<br>$\omega_{\text{TEKAY/REINA/GALADRIEL}} = 0.06668$ |

# Analysis of rt tree

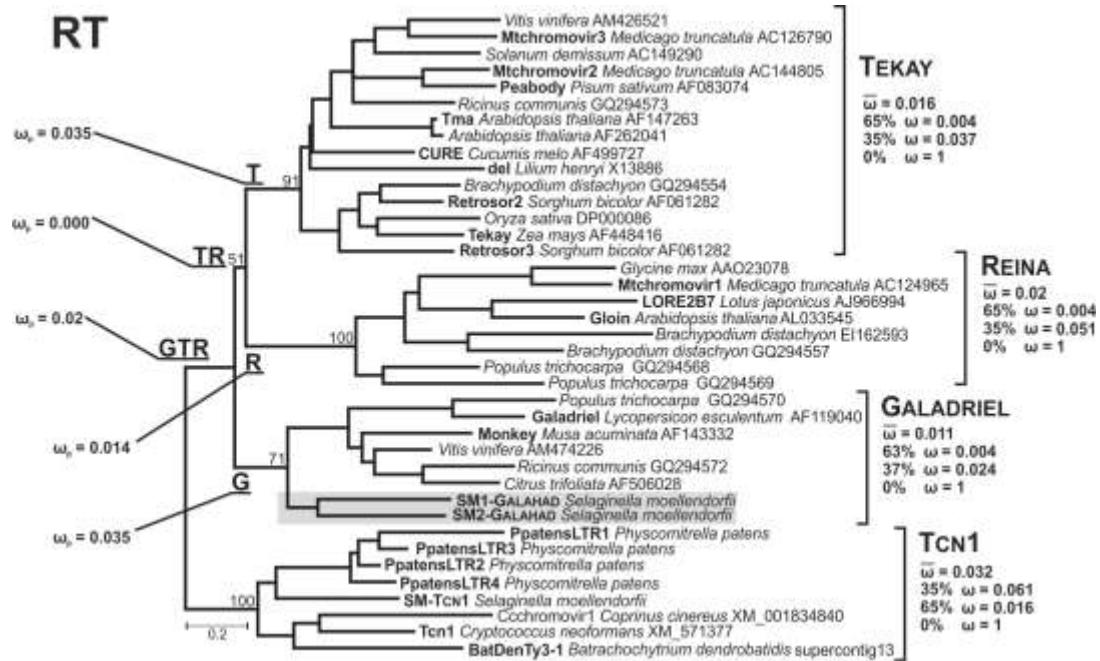

**Clade tests with several branch types (Yang's Model C).**

| Model                | lnL           | Significant | Class 0                                 | Class 1                                 | Class 2                                                                                                                                                                                         |
|----------------------|---------------|-------------|-----------------------------------------|-----------------------------------------|-------------------------------------------------------------------------------------------------------------------------------------------------------------------------------------------------|
| Null 1 (M1a) (np=77) | -12681.467466 |             | p = 0.96420<br>$\omega$ = 0.02376       | p = 0.03580<br>$\omega$ = 1.00000       |                                                                                                                                                                                                 |
| Model C (np=84)      | -12301.725739 | Yes         | p = 0.64927<br>$\omega_{ALL}$ = 0.00898 | p = 0.00000<br>$\omega_{ALL}$ = 1.00000 | p = 0.35073<br>$\omega_{TCN, REINA, GALADRIEL, TEKAY}$ = 0.06463<br>$\omega_{TR}$ = 0.00010<br>$\omega_G$ = 0.03462<br>$\omega_{GTR}$ = 0.02032<br>$\omega_T$ = 0.03451<br>$\omega_R$ = 0.01397 |



**Clade-sites test (Yang's Model C). (df = 3; 7.81 (0.05 level); 11.34 (0.01 level))**

Clade-sites test (Yang's Model C) comparing TEKAY to REINA

| Model                  | lnL          | Significant | Class 0                                                                               | Class 1                                                                               | Class 2                                                                               |
|------------------------|--------------|-------------|---------------------------------------------------------------------------------------|---------------------------------------------------------------------------------------|---------------------------------------------------------------------------------------|
| Null 1 (M1a) (np = 46) | -7442.407249 |             | p = 0.93598<br>$\omega = 0.00893$                                                     | p = 0.06402<br>$\omega = 1.00000$                                                     |                                                                                       |
| Model C (np = 49)      | -7203.037533 | Yes         | p = 0.64828<br>$\omega_{\text{TEKAY}} = 0.00447$<br>$\omega_{\text{REINA}} = 0.00447$ | p = 0.00000<br>$\omega_{\text{TEKAY}} = 1.00000$<br>$\omega_{\text{REINA}} = 1.00000$ | p = 0.35172<br>$\omega_{\text{TEKAY}} = 0.03678$<br>$\omega_{\text{REINA}} = 0.05055$ |

Clade-sites test (Yang's Model C) comparing GALADRIEL to TEKAY/REINA

| Model                  | lnL           | Significant | Class 0                                                                                         | Class 1                                                                                         | Class 2                                                                                         |
|------------------------|---------------|-------------|-------------------------------------------------------------------------------------------------|-------------------------------------------------------------------------------------------------|-------------------------------------------------------------------------------------------------|
| Null 1 (M1a) (np = 62) | -10080.622888 |             | p = 0.97356<br>$\omega = 0.01050$                                                               | p = 0.02644<br>$\omega = 1.00000$                                                               |                                                                                                 |
| Model C (np = 65)      | -9754.644094  | Yes         | p = 0.62908<br>$\omega_{\text{TEKAY/REINA}} = 0.00432$<br>$\omega_{\text{GALADRIEL}} = 0.00432$ | p = 0.00000<br>$\omega_{\text{TEKAY/REINA}} = 1.00000$<br>$\omega_{\text{GALADRIEL}} = 1.00000$ | p = 0.37092<br>$\omega_{\text{TEKAY/REINA}} = 0.03791$<br>$\omega_{\text{GALADRIEL}} = 0.02403$ |

Clade-sites test (Yang's Model C) comparing TCN to GALADRIEL/TEKAY/REINA

| Model            | lnL           | Significant | Class 0                                                                                             | Class 1                                                                                             | Class 2                                                                                             |
|------------------|---------------|-------------|-----------------------------------------------------------------------------------------------------|-----------------------------------------------------------------------------------------------------|-----------------------------------------------------------------------------------------------------|
| Null 1 (M1a)     | -12681.467466 |             | p = 0.96420<br>$\omega = 0.02376$                                                                   | p = 0.03580<br>$\omega = 1.00000$                                                                   |                                                                                                     |
| Model C (np =80) | -12305.690695 | Yes         | p = 0.34595<br>$\omega_{\text{TCN}} = 0.06136$<br>$\omega_{\text{GALADRIEL/TEKAY/REINA}} = 0.06136$ | p = 0.00000<br>$\omega_{\text{TCN}} = 1.00000$<br>$\omega_{\text{GALADRIEL/TEKAY/REINA}} = 1.00000$ | p = 0.65405<br>$\omega_{\text{TCN}} = 0.01572$<br>$\omega_{\text{GALADRIEL/TEKAY/REINA}} = 0.00835$ |
